# Supplementary material
Source: Royal Society of Chemistry journal article supplement (doi:10.1039/d6me00008h)
Supplement: d6me00008h1.pdf [file d6me00008h1.pdf]

Supplementary Materials for  
**Synergistic Engineering of Energetic Materials: From Molecular  
Design to Advanced Manufacturing**

Haoran Liu, Chunlin Zhao, Qingyan Pan\*, Ning Wang\*

(Norinco Group Qingyang Chemical Industry Corporation, Liaoyang 111002)

## Nitro-Containing Compounds

**Table S1.** The properties of some nitrate ester compounds.

| Compounds | $\rho$ , g/cm <sup>3</sup> | Q, J/g | V <sub>d</sub> , m/s | P <sub>d</sub> , GPa | IS, J | Ref. |
|-----------|----------------------------|--------|----------------------|----------------------|-------|------|
| NC        | 1.64                       | 4300   | 6970                 | 20.8                 | 3.0   | [1]  |
| NCh       | 1.68                       | 7832   | 7810                 | 24.0                 | 14.2  | [1]  |
| NG(l)     | 1.60                       | 6214   | 8030                 | 26.5                 | 0.2   | [2]  |
| PETN      | 1.77                       | 6350   | 8710                 | 33.0                 | 5.1   | [2]  |

Q: heat of explosion, V<sub>d</sub>: detonation velocity, P<sub>d</sub>: Explosion pressure, I<sub>e</sub>: impact sensitivity.

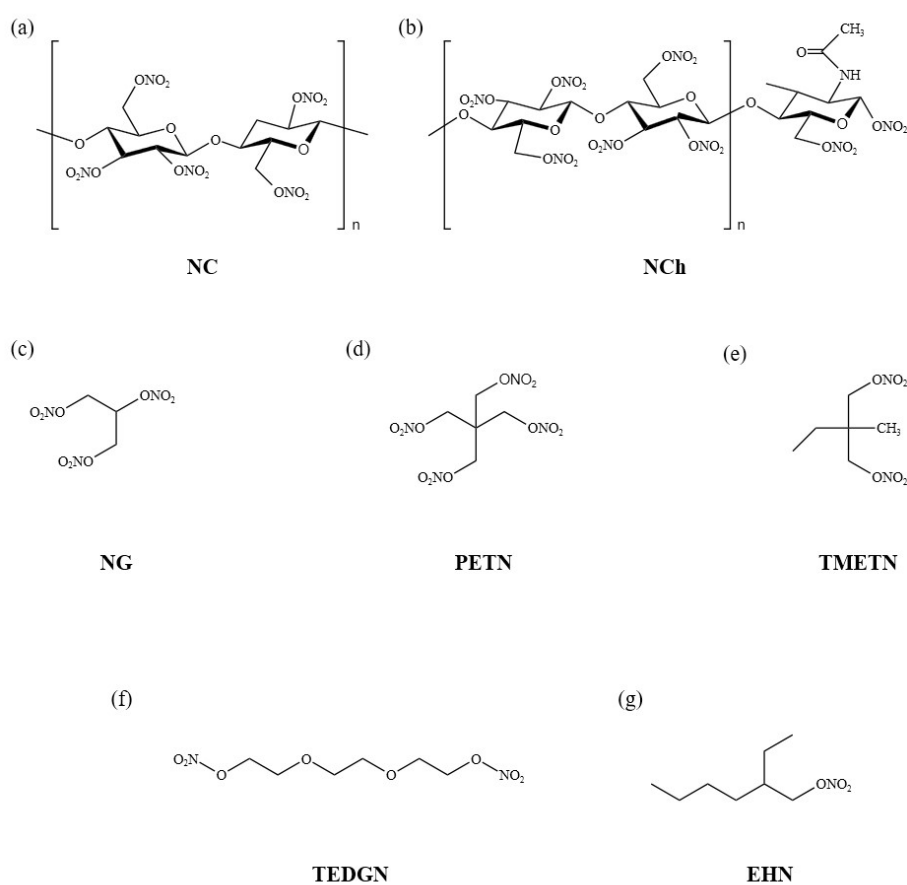

**Figure S1.** Molecular Structures of Nitrate Esters: (a) Nitrocellulose (NC), (b) Nitrochitosan (NCh), (c) Nitroglycerin (NG), (d) Pentaerythritol Tetranitrate (PETN), (e) Trimethylolethane Trinitrate (TMETN), (f) Triethylene Glycol Dinitrate (TEGDN), (g) 2-Ethylhexyl Nitrate (EHN).

**Table S2.** The properties of some nitramines compounds.

| Compounds | $\rho$ , g/cm <sup>3</sup> | Q, J/g | V <sub>d</sub> , m/s | P <sub>d</sub> , GPa | IS, J | Ref. |
|-----------|----------------------------|--------|----------------------|----------------------|-------|------|
| RDX       | 1.81                       | 5350   | 8748                 | 34.9                 | 5.6   | [3]  |

|       |      |      |      |      |     |     |
|-------|------|------|------|------|-----|-----|
| HMX   | 1.91 | 5680 | 9320 | 39.5 | 6.4 | [4] |
| CL-20 | 2.05 | 6300 | 9406 | 44.6 | 4.1 | [5] |

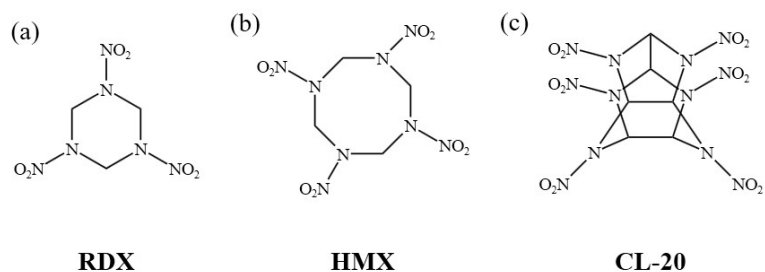

**Figure S2.** Molecular Structures of Nitramines: (a) Hexogen (RDX), (b) Octogen (HMX) (c) Hexanitrohexaazaisowurtzitane (CL-20).

**Table S3.** The properties of some nitrocarbon compounds.

| Compounds | $\rho$ , g/cm <sup>3</sup> | Q, J/g | V <sub>d</sub> , m/s | P <sub>d</sub> , GPa | IS, J | Ref. |
|-----------|----------------------------|--------|----------------------|----------------------|-------|------|
| TNT       | 1.65                       | 4184   | 6820                 | 19.5                 | 15    | [6]  |
| TNP       | 1.81                       | 5400   | 7830                 | 27.2                 | 7.4   | [6]  |
| TNA       | 1.77                       | 4300   | 7523                 | 24.8                 | 22    | [7]  |
| HNB       | 1.93                       | 7774   | 9330                 | 40.2                 | < 1   | [8]  |
| TATB      | 1.94                       | 3200   | 8540                 | 32.1                 | 50    | [9]  |
| NM(I)     | 1.14                       | 4200   | 6200                 | 11.2                 | 10    | [10] |
| TNM       | 1.62                       | 2076   | 6368                 | 14.8                 | 0.4   | [11] |
| FOX-7     | 1.89                       | 4860   | 8930                 | 34.0                 | 60    | [12] |

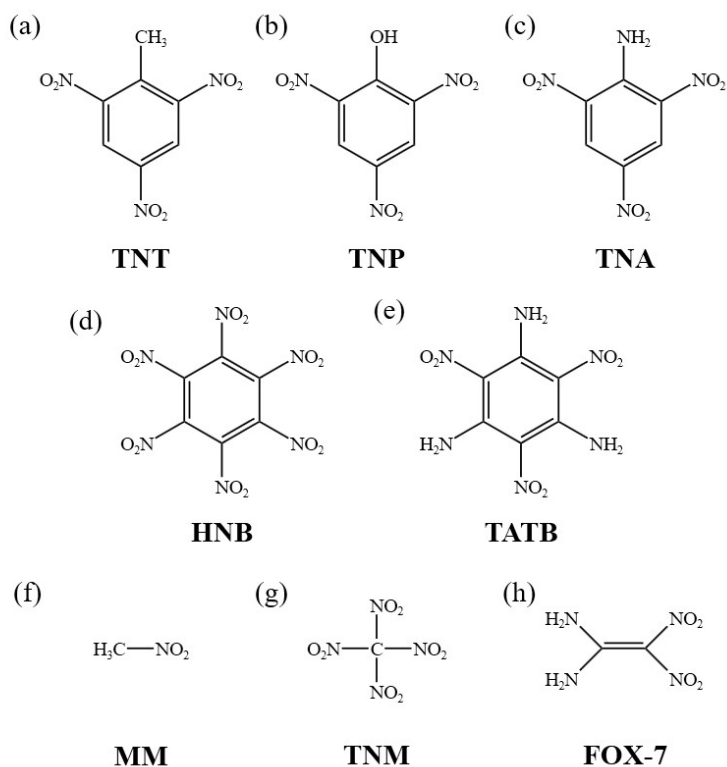

**Figure S3.** Molecular Structures of Nitrocarbon: (a) Trinitrotoluene (TNT), (b) Trinitrophenol (TNP) (c) Trinitroaniline (TNA), (d) Hexanitrobenzene (HNB), (e) 1,3,5-triamino-2,4,6-trinitrobenzene (TATB), (f) Nitromethane (MM), (g) Tetranitromethane (TNM), (h) 1,1-diamino-2,2-dinitroethylene (FOX-7)

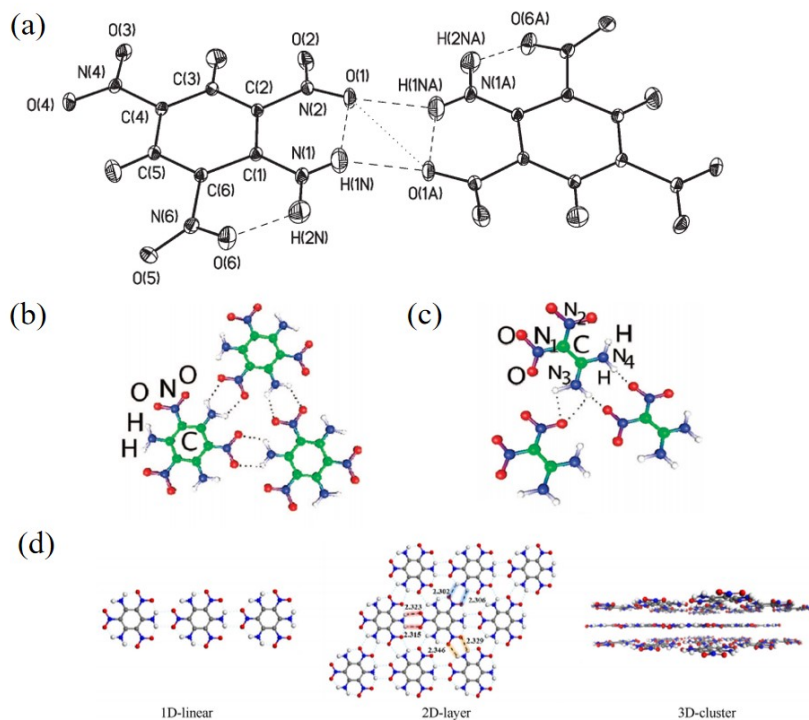

**Figure S4.** (a) Thermal ellipsoid representation of TNA dimers within the crystal lattice [13].

Copyright 2013, RSC (b) Layered molecular packing of TATB in the crystalline state [14]. (c) Layered arrangement of FOX-7 molecules within the crystal structure [14]. Copyright 2008, ACS (d) Schematic illustration of TATB cluster extraction across varying dimensional scales [15].  
Copyright 2023, Elsevier.

### Nitrogen-Rich Compounds

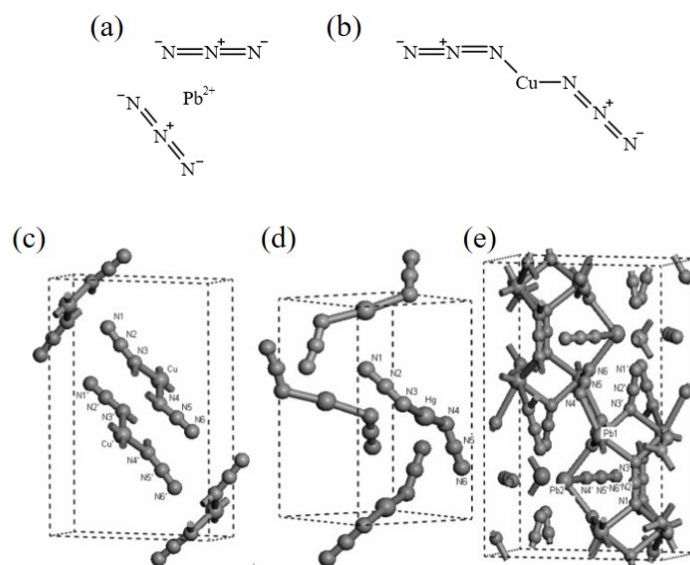

**Figure S5.** Electronic formula for (a)  $\text{Pb}(\text{N}_3)_2$  (ionic compound), (b)  $\text{Cu}(\text{N}_3)_2$  (covalent compound). Unit cells for (c)  $\text{Cu}(\text{N}_3)_2$ , (d)  $\text{Hg}(\text{N}_3)_2$ , and (e)  $\text{Pb}(\text{N}_3)_2$ . Big spheres stand for metal cations, and small spheres, nitrogen anions [16]. Copyright 2006, ACS.

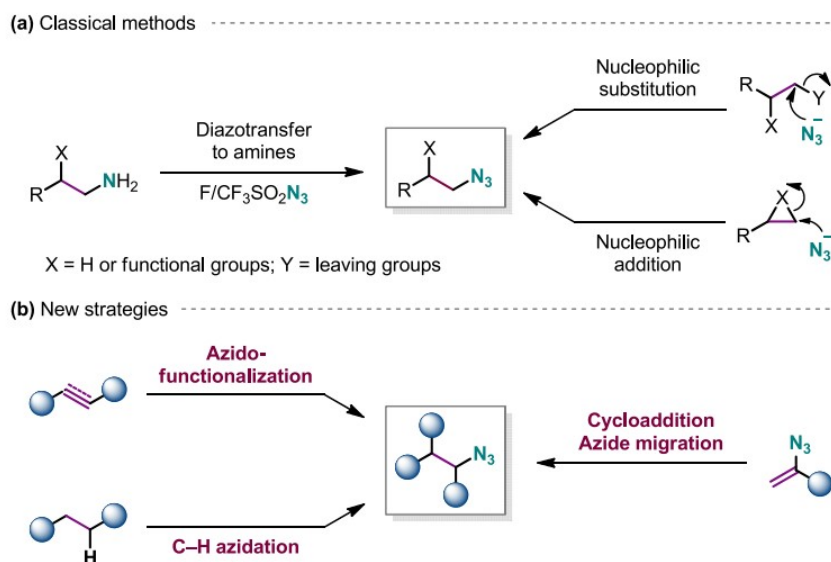

**Figure S6.** Strategies for the preparation of aliphatic azides [17]. Copyright 2021, ACS.

**Table S4.** The properties of  $\text{N}^+ 5$  ionic compounds.

| Compounds                       | $\rho$ , g/cm <sup>3</sup> | $\Delta H_f$ , J/g | $V_d$ , m/s | $P_d$ , GPa | Td, °C | Ref. |
|---------------------------------|----------------------------|--------------------|-------------|-------------|--------|------|
| $[\text{N}^+ 5][\text{NO}_3^-]$ | 1.81                       | 4400               | 8642        | 30.3        |        | [18] |

|                     |      |      |       |       |      |
|---------------------|------|------|-------|-------|------|
| [N+<br>5][N(NO2)-2] | 1.88 | 4200 | 8859  | 32.3  | [18] |
| N+ 5N- 3            | 1.55 | 9020 | 9290  | 34.67 | [19] |
| N+ 5N- 5            | 1.80 | 8450 | 10210 | 45.56 | [19] |

$\Delta H_f$  Heat of formation.

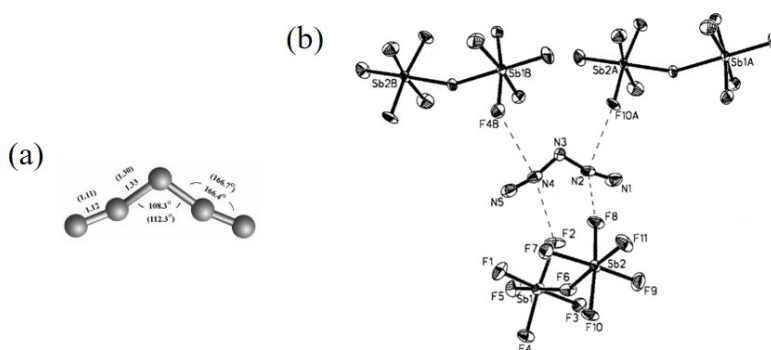

**Figure S7.** (a) Optimized structures of N+ 5 calculated at the B3LYP (values given in parentheses) and CCSD(T)/6-311+G(2d) levels of theory [20]. Copyright 1999, John Wiley and Sons Ltd. (b) ORTEP diagram of N+ 5Sb<sub>2</sub>F<sup>-</sup> 11, showing the thermal ellipsoids at the 30% probability level and the close-range N...F contacts within the crystal lattice [21]. Copyright 2001, ACS.

**Table S5.** The properties of N- 5 ionic compounds.

| Compounds                                                                                                                     | $\rho$ , g/cm <sup>3</sup> | $\Delta H_f$ ,<br>J/g | $V_d$ , m/s | $P_d$ , GPa | Td, °C | Ref. |
|-------------------------------------------------------------------------------------------------------------------------------|----------------------------|-----------------------|-------------|-------------|--------|------|
| [N(CH <sub>3</sub> ) <sub>4</sub> ] <sup>+</sup> N <sup>-</sup> 5                                                             | 1.25                       | 2064                  | 5880        | 10.1        | 81     | [22] |
| [(N <sub>2</sub> H <sub>3</sub> ) <sub>2</sub> CNH <sub>2</sub> ] <sup>+</sup> N <sup>-</sup> 5                               | 1.44                       | 4806                  | 7505        | 21.2        | 101    | [23] |
| (NH <sub>4</sub> ) <sup>+</sup> N <sup>-</sup> 5                                                                              | 1.49                       | 7118                  | 7757        | 23.2        | 106    | [23] |
| [NH <sub>3</sub> C(NH) <sub>2</sub> CH <sub>2</sub> COOH] <sup>+</sup> N <sup>-</sup> 5                                       | 1.52                       | 502.2                 | 7392        | 18.1        | 108    | [24] |
| [Fe(H <sub>2</sub> O) <sub>4</sub> (N <sub>5</sub> ) <sub>2</sub> ] <sup>+</sup> ·4H <sub>2</sub> O                           | 1.58                       |                       |             |             | 115    | [25] |
| [Mn(H <sub>2</sub> O) <sub>4</sub> (N <sub>5</sub> ) <sub>2</sub> ] <sup>+</sup> ·4H <sub>2</sub> O                           | 1.59                       |                       |             |             | 104    | [25] |
| (NH <sub>3</sub> OH) <sup>+</sup> N <sup>-</sup> 5                                                                            | 1.60                       | 6438                  | 9005        | 32.7        | 106    | [23] |
| (N <sub>2</sub> H <sub>5</sub> ) <sup>+</sup> N <sup>-</sup> 5                                                                | 1.62                       | 4576                  | 10400       | 37.0        | 85     | [22] |
| [C <sub>2</sub> N <sub>3</sub> H <sub>2</sub> C(NH <sub>2</sub> ) <sub>2</sub> ] <sup>+</sup> N <sup>-</sup> 5                | 1.62                       | 3217                  | 8187        | 22.9        | 96     | [26] |
| [Zn(H <sub>2</sub> O) <sub>4</sub> (N <sub>5</sub> ) <sub>2</sub> ] <sup>+</sup> ·4H <sub>2</sub> O                           | 1.65                       |                       |             |             | 108    | [27] |
| [C <sub>7</sub> N <sub>8</sub> H <sub>2</sub> (NH <sub>2</sub> ) <sub>4</sub> NO <sub>2</sub> ] <sup>+</sup> N <sup>-</sup> 5 | 1.70                       | 2868                  | 8124        | 23.7        | 111    | [28] |
| KN <sub>5</sub>                                                                                                               | 196                        | 4592                  | 6977        | 20.9        | 110    | [23] |

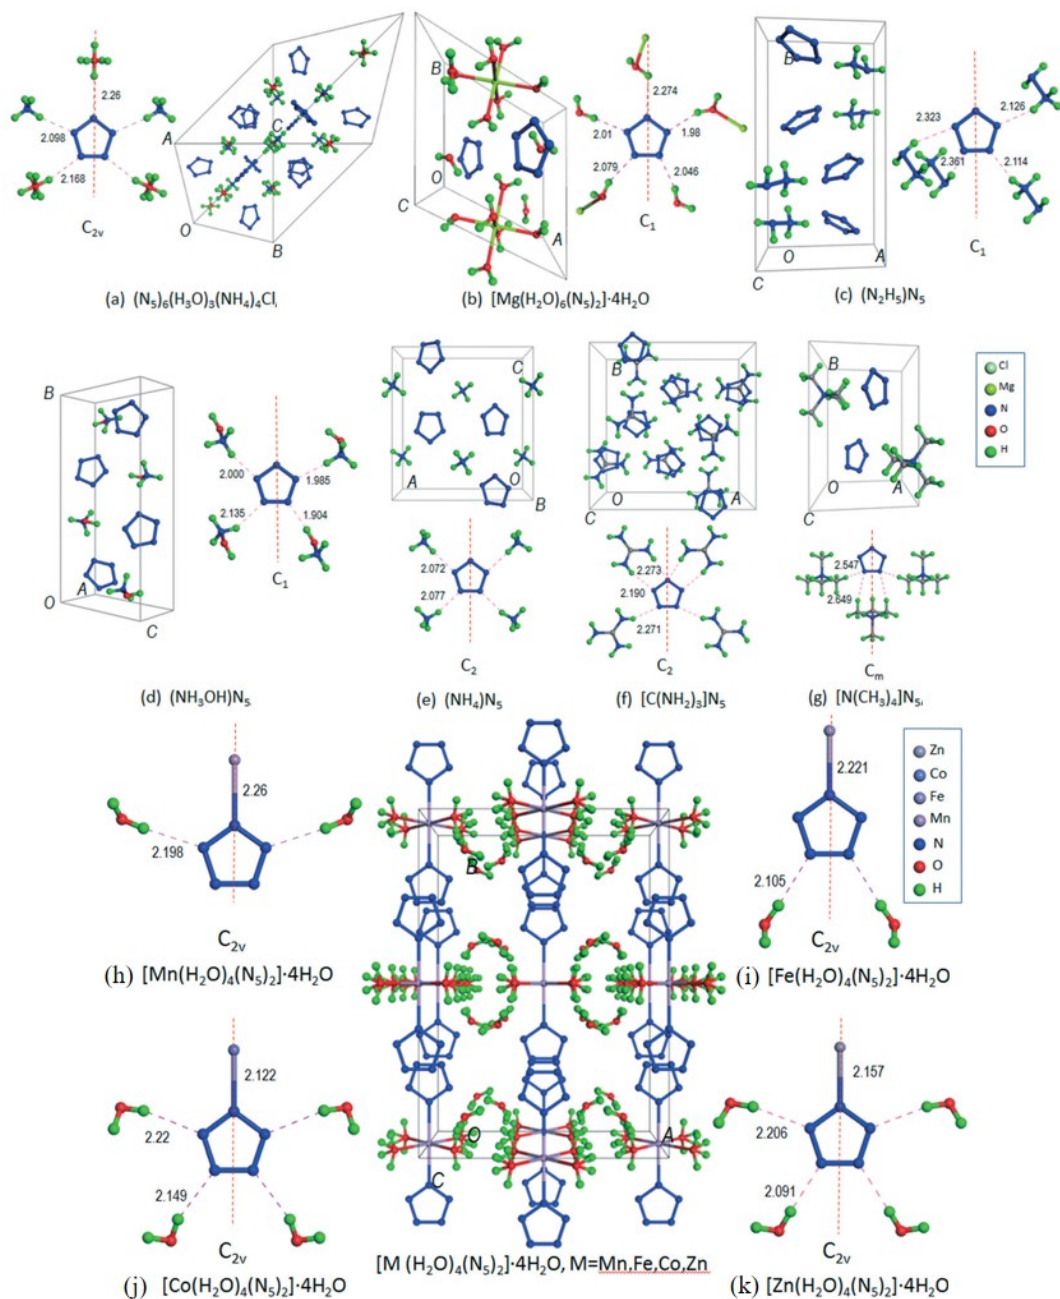

**Figure S8.** Bonding of cyclo-N-5 and molecular stacking of group I,II [29]. Copyright 2019, RSC.

## Nitrogen-containing heteroaromatics

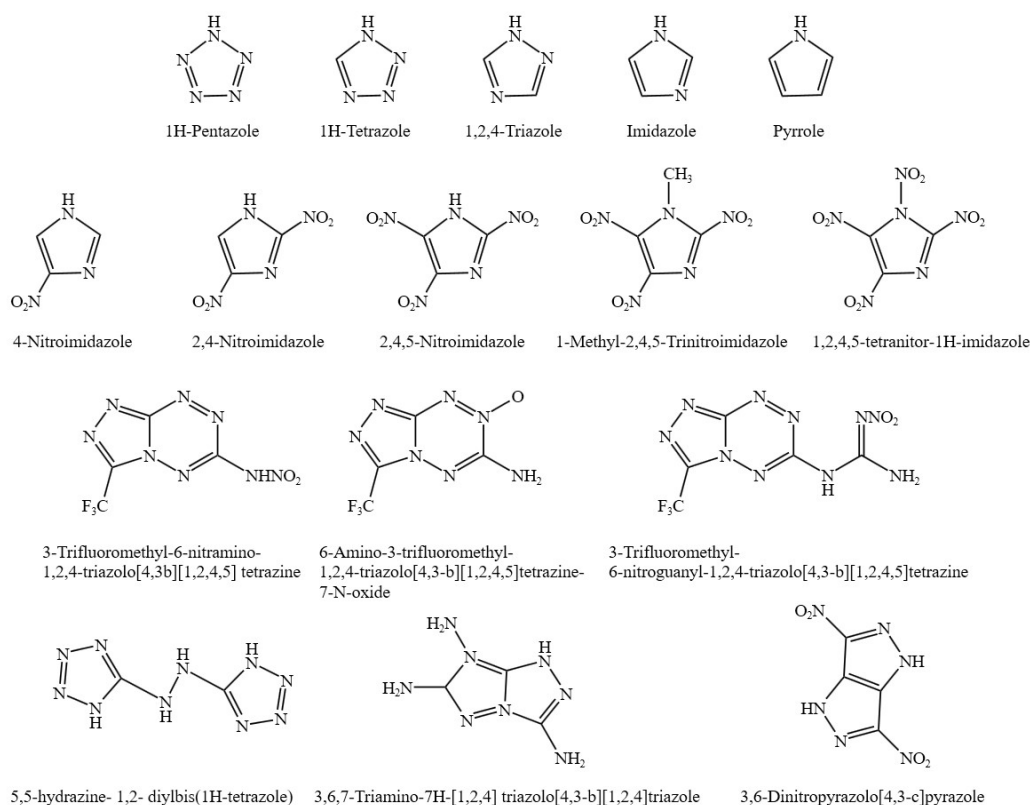

**Figure S9.** Molecular structures of some azole compounds and derivatives

**Table S6.** The properties of Azole compounds.

| Compounds                                                                   | $\rho$ , g/cm <sup>3</sup> | $\Delta H_f$ , J/g | $V_d$ , m/s | $P_d$ , GPa | IS, J   | Ref. |
|-----------------------------------------------------------------------------|----------------------------|--------------------|-------------|-------------|---------|------|
| 1H-Tetrazole                                                                | 1.53                       | 2495               | 7813        | 21.0        | <4      | [30] |
| 4-Nitroimidazole                                                            | 1.56                       |                    | 6860        | 19.1        | 22.6    | [31] |
| 2,4-Nitroimidazole                                                          | 1.75                       |                    | 8130        | 29.0        | 51.4    | [31] |
| 2,4,5-Trinitroimidazole                                                     | 1.88                       |                    | 8980        | 36.7        | 14.2    | [31] |
| 1-Methyl-2,4,5-Trinitroimidazole                                            | 1.77                       |                    | 8130        | 28.1        | 14.6    | [32] |
| 1,2,4,5-tetranitor-1H-imidazole                                             | 1.90                       | 1519               | 9437        | 39.0        | <1      | [33] |
| 3-Trifluoromethyl-6-nitramino-1,2,4-triazolo[4,3b][1,2,4,5]tetrazine        | 1.75                       |                    | 7179        | 20.8        | 10      | [34] |
| 6-Amino-3-trifluoromethyl-1,2,4-triazolo[4,3-b][1,2,4,5]tetrazine-7-N-oxide | 1.79                       |                    | 6925        | 18.8        | 36      | [34] |
| 3-Trifluoromethyl-6-nitroguanyl-1,2,4-triazolo[4,3-b][1,2,4,5] tetrazine    | 1.90                       |                    | 7877        | 26.8        | ><br>60 | [34] |
| 5,5-hydrazine-1,2- diylbis(1H-tetrazole)                                    | 1.84                       | 414                | 8523        | 27.7        | ><br>30 | [35] |

|                                                         |      |      |      |      |    |      |
|---------------------------------------------------------|------|------|------|------|----|------|
| 3,6,7-Triamino-7H-[1,2,4]triazolo[4,3-b][1,2,4]triazole | 1.73 | 3060 | 8580 | 25.9 | 40 | [36] |
| 3,6-Dinitropyrazolo[4,3-c]pyrazole                      | 1.85 | 1940 | 8250 | 27.4 | 15 | [37] |

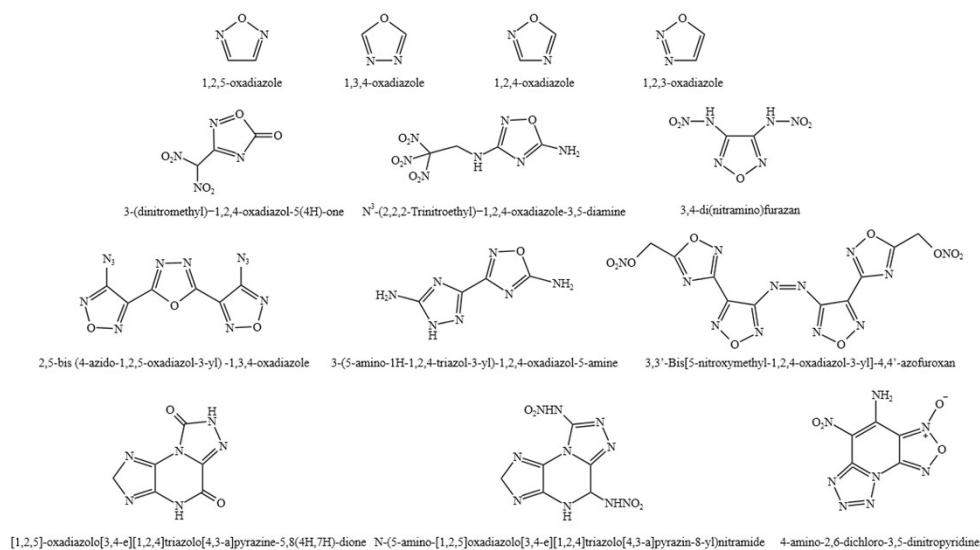

**Figure S10.** Molecular structures of some oxazoles compounds and derivatives.

**Table S7.** The properties of oxazoles compounds.

| Compounds                                                                       | $\rho$ , g/cm <sup>3</sup> | $\Delta H_f$ , J/g | $V_d$ , m/s | $P_d$ , GPa | IS, J | Ref. |
|---------------------------------------------------------------------------------|----------------------------|--------------------|-------------|-------------|-------|------|
| 3-(dinitromethyl)-1,2,4-oxadiazol-5(4H)-one                                     | 1.71                       | 2130               | 7937        | 24.5        | 13    | [38] |
| N <sup>3</sup> -(2,2,2-Trinitroethyl)-1,2,4-oxadiazole-3,5-diamine              | 1.80                       |                    | 8500        | 31.2        | 6     | [39] |
| 3,4-di(nitramino)furazan                                                        | 1.90                       | 1510               | 9376        | 40.5        | < 1   | [40] |
| 2,5-bis(4-azido-1,2,5-oxadiazol-3-yl)-1,3,4-oxadiazole                          | 1.76                       | 4720               | 8728        | 31.2        | 21.9  | [41] |
| 3-(5-amino-1H-1,2,4-triazol-3-yl)-1,2,4-oxadiazol-5-amine                       | 1.78                       | 1672               | 7871        | 21.8        | > 40  | [42] |
| 3,3'-Bis[5-nitroxymethyl-1,2,4-oxadiazol-3-yl]-4,4'-azofuroxan                  | 1.78                       | 3389               | 8081        | 27.4        | 35    | [43] |
| N-(5-amino-[1,2,5]oxadiazolo[3,4-e][1,2,4]triazolo[4,3-a]pyrazin-8-yl)nitramide | 1.83                       | 2540               | 8530        | 30.1        | 26    | [44] |
| [1,2,5]-oxadiazolo[3,4-                                                         | 1.84                       | 570                | 7984        | 24.9        | 22    | [44] |

|                                                                                                       |      |      |      |      |   |      |
|-------------------------------------------------------------------------------------------------------|------|------|------|------|---|------|
| e][1,2,4]triazolo[4,3-a]pyrazine-<br>5,8(4H,7H)-dione<br>4-amino-2,6-dichloro-3,5-<br>dinitropyridine | 1.92 | 3815 | 8838 | 36.0 | 3 | [45] |
|-------------------------------------------------------------------------------------------------------|------|------|------|------|---|------|

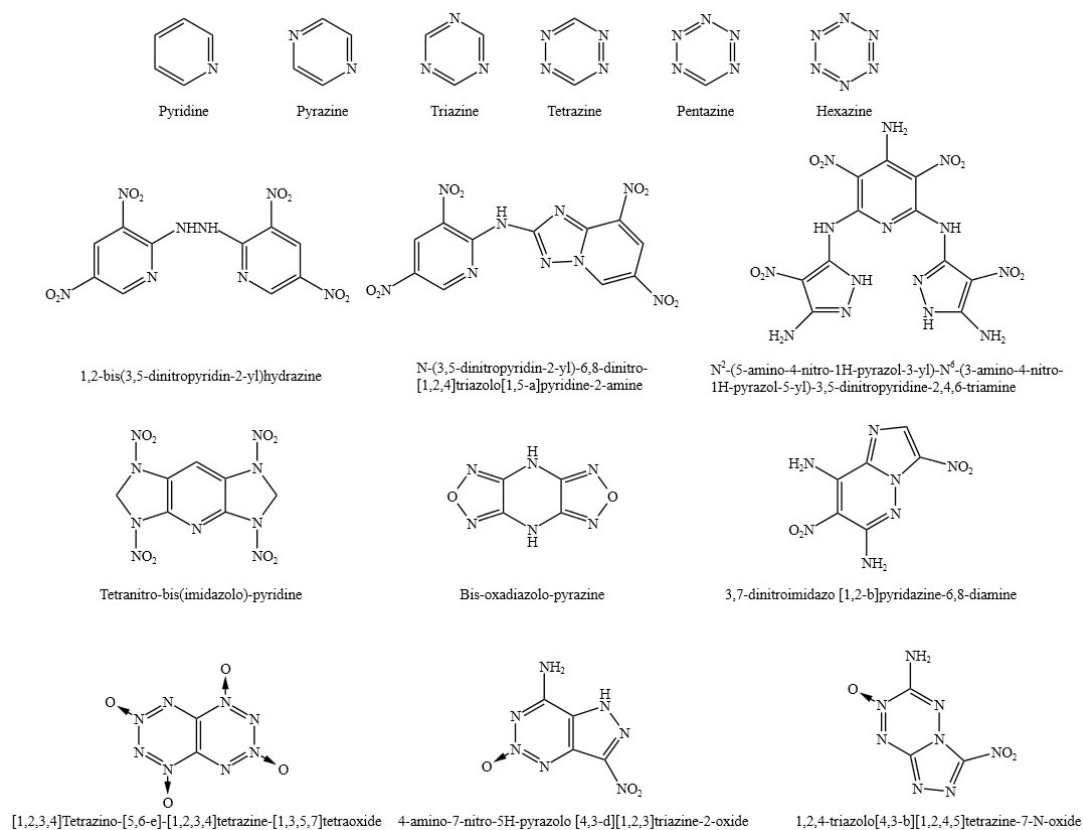

**Figure S11.** Molecular structures of some pyrimidine compounds and derivatives.

**Table S8.** The properties of pyrimidine compounds.

| Compounds                                                                                                                              | $\rho$ , g/cm <sup>3</sup> | $\Delta H_f$ ,<br>J/g | $V_d$ , m/s | $P_d$ , GPa | IS, J | Ref. |
|----------------------------------------------------------------------------------------------------------------------------------------|----------------------------|-----------------------|-------------|-------------|-------|------|
| 1,2-bis(3,5-dinitropyridin-2-yl)hydrazine                                                                                              | 1.74                       | 973                   | 7862        | 25.4        | > 40  | [46] |
| N-(3,5-dinitropyridin-2-yl)-6,8-dinitro-[1,2,4]triazolo[1,5-a]pyridine-2-amine                                                         | 1.80                       | 1196                  | 8024        | 26.9        | > 40  | [46] |
| N <sup>2</sup> -(5-amino-4-nitro-1H-pyrazol-3-yl)-N <sup>6</sup> -(3-amino-4-nitro-1H-pyrazol-5-yl)-3,5-dinitropyridine-2,4,6-triamine | 1.90                       | 1911                  | 8889        | 33.9        | 35    | [47] |

|                                                                           |      |      |       |      |      |      |
|---------------------------------------------------------------------------|------|------|-------|------|------|------|
| Tetranitro-bis(imidazolo)-<br>pyridine                                    | 1.90 | 1351 | 8560  | 33.6 | -    | [48] |
| Bis-oxadiazolo-pyrazine                                                   | 1.77 | 2333 | 7380  | 24.0 | 9.8  | [49] |
| 3,7-dinitroimidazo [1,2-<br>b]pyridazine-6,8-diamine                      | 1.80 | 1876 | 8434  | 27.7 | > 40 | [50] |
| [1,2,3,4]Tetrazino-[5,6-e]-<br>[1,2,3,4]tetrazine-<br>[1,3,5,7]tetraoxide | 2.00 | 1000 | 10900 | 60.0 | -    | [51] |
| 4-amino-7-nitro-5H-pyrazolo<br>[4,3-d][1,2,3]triazine-2-oxide             | 1.84 | 2070 | 8731  | 31.2 | >20  | [52] |
| 1,2,4-triazolo[4,3-<br>b][1,2,4,5]tetrazine-7-N-oxide                     | 1.86 | 3760 | 9320  | 39.5 | 7    | [53] |

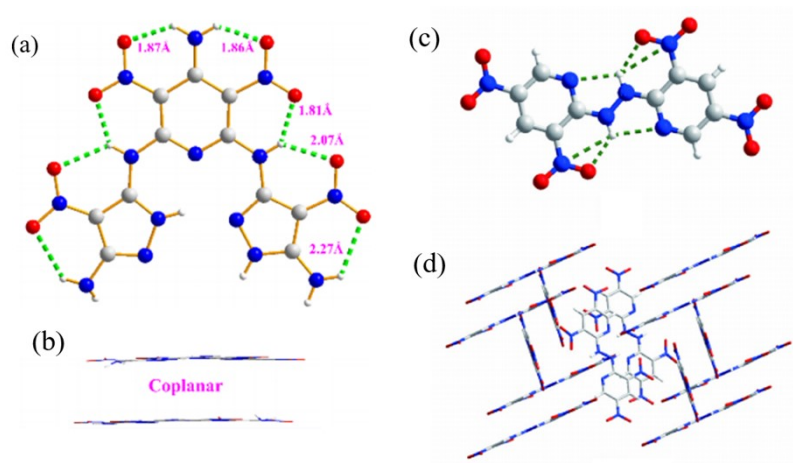

**Figure S12.** (a) (b) intramolecular hydrogen bond strengths and intermolecular conjugation structure of  $N^2$ -(5-amino-4-nitro-1H-pyrazol-3-yl)- $N^6$ -(3-amino-4-nitro-1H-pyrazol-5-yl)-3,5-dinitropyridine-2,4,6-triamine<sup>[47]</sup>, (c) (d) Intramolecular hydrogen-bond and Stacking diagram of 1,2-bis(3,5-dinitropyridin-2-yl)hydrazine<sup>[46]</sup>. Copyright 2022, Elsevier.

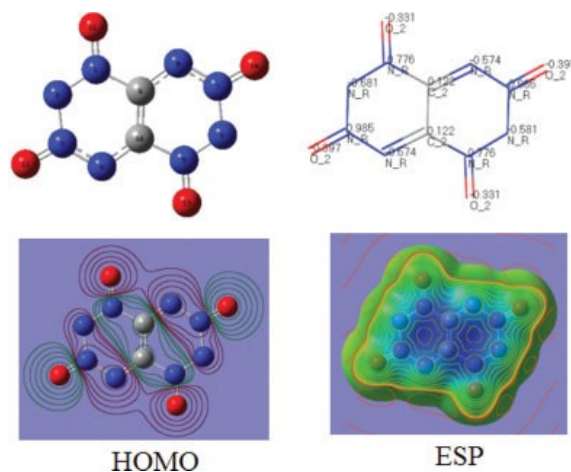

**Figure S13.** Molecular structure, Dreiding atomic types and CHelpG atomic charges, HOMO, and ESP of TTTO<sup>[51]</sup>.

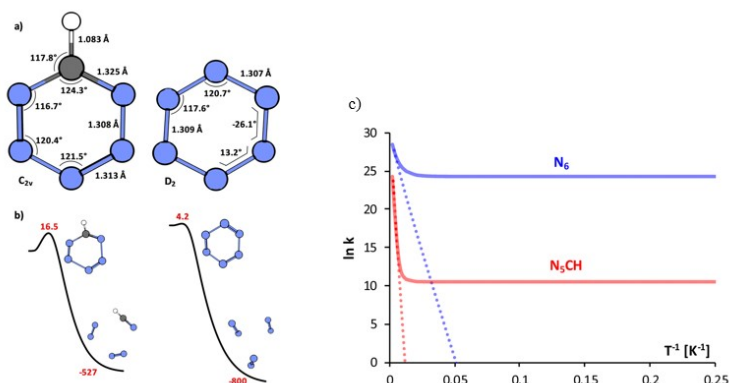

**Figure S14.** Pentazine ( $C_{2V}$ ) and hexazine ( $D_2$ ) stable geometries computed with MN15/Def2TZVP (a) and their decomposition paths (b). Relative energies + ZPE (kJ/mol) are presented in red. (c) Semi-classical (dashed lines) and tunneling included (solid lines) Arrhenius plots of hexazine and pentazine <sup>[54]</sup>. Copyright 2024, RSC.

### Cage-Structured Frameworks

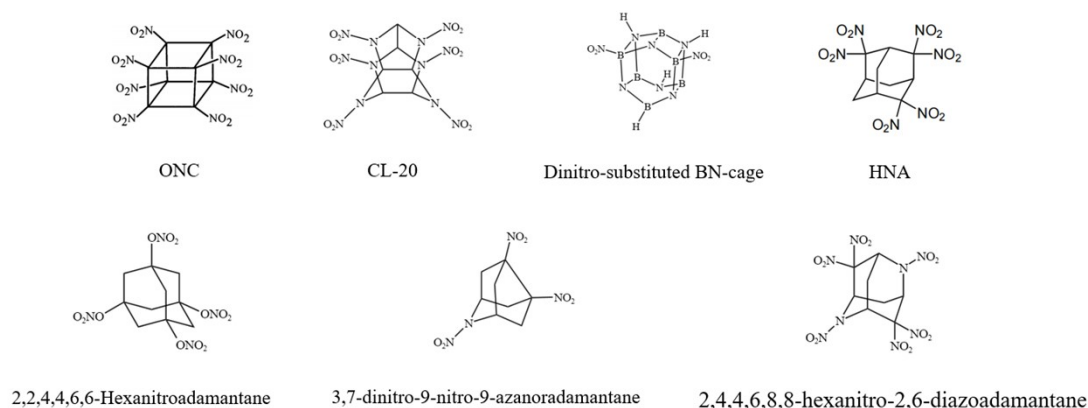

**Figure S15.** Some cage like molecular structures with high energy density

**Table S9.** The properties of cage like molecular structures compounds.

| Compounds                              | $\rho$ , g/cm <sup>3</sup> | $\Delta H f$ ,<br>J/g | $V_d$ , m/s | $P_d$ , GPa | IS, J | Ref. |
|----------------------------------------|----------------------------|-----------------------|-------------|-------------|-------|------|
| ONC                                    | 2.19                       | 862                   | 10800       | 52.1        |       | [55] |
| CL-20                                  | 2.05                       | 2178                  | 9406        | 44.6        | 4.1   | [56] |
| dinitro-substituted BN-cage            | 1.93                       | 547                   | 7223        | 25.0        | 12.3  | [57] |
| HNA                                    | 1.78                       | 226                   | 8443        | 33.0        |       | [58] |
| 2,2,4,4,6,6-Hexanitroadamantane        | 1.71                       | 1529                  | 7282        | 22.9        | 10    | [59] |
| 3,7-dinitro-9-nitro-9-azanoradamantane | 1.65                       | 160                   | 7157        | 19.9        |       | [60] |

2,4,4,6,8,8-hexanitro-2,6-  
diazoadamantane

1.96

416

9310

40.3

[61]

### Energetic Ionic Compounds

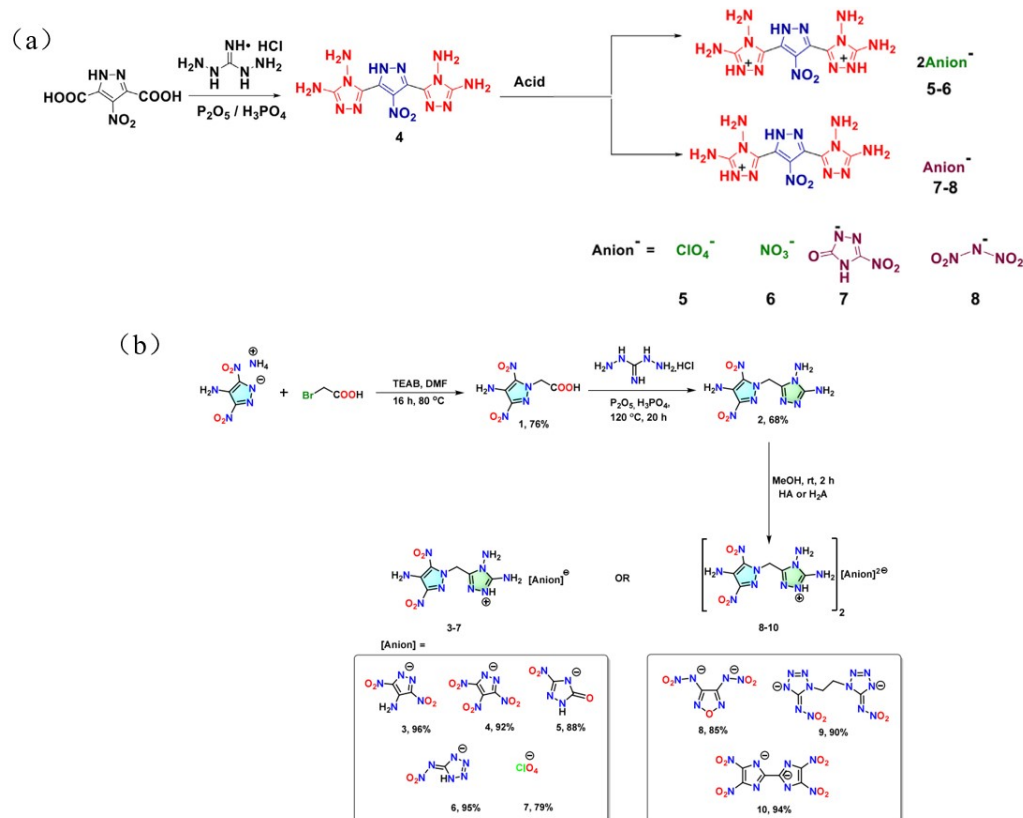

**Figure S16.** Molecular structure of organic ion energetic materials<sup>[62, 63]</sup>. Copyright 2021, 2024 Elsevier and ACS.

**Table S10.** The properties of organic ion energetic compounds<sup>[62, 63]</sup>.

| Compounds | $T_d$ , °C | $\rho$ , g/cm <sup>3</sup> | $\Delta H f_{\infty}$ ,<br>kJ/mol | $V_d$ , m/s | $P_d$ , GPa | IS, J | FS, N | Ref. |
|-----------|------------|----------------------------|-----------------------------------|-------------|-------------|-------|-------|------|
| a-4       | 318.6      | 1.73                       | 923                               | 8197        | 24.2        | > 40  | > 360 | [62] |
| a-5       | 304.2      | 1.83                       | 243                               | 8133        | 28.2        | > 40  | > 360 | [62] |
| a-6       | 235.2      | 1.79                       | 135                               | 8266        | 26.3        | > 40  | > 360 | [62] |
| a-7       | 255.6      | 1.76                       | 800                               | 8008        | 23.9        | > 40  | > 360 | [62] |
| a-8       | 195.3      | 1.79                       | 1040                              | 8716        | 30.3        | 32    | 280   | [62] |
| b-2       | 210        | 1.74                       | 347                               | 7783        | 23.0        | > 40  | > 360 | [63] |
| b-3       | 270        | 1.78                       | 576                               | 8166        | 26.4        | > 40  | > 360 | [63] |
| b-4       | 219        | 1.83                       | 559                               | 8441        | 30.1        | > 40  | > 360 | [63] |
| b-5       | 212        | 1.74                       | 674                               | 8122        | 26.1        | > 40  | > 360 | [63] |
| b-6       | 211        | 1.79                       | 769                               | 8480        | 28.2        | > 40  | > 360 | [63] |

|      |     |      |      |      |      |      |       |      |
|------|-----|------|------|------|------|------|-------|------|
| b-7  | 212 | 1.85 | 318  | 8415 | 30.5 | > 40 | > 360 | [63] |
| b-8  | 219 | 1.75 | 1925 | 8519 | 29.7 | 5    | 80    | [63] |
| b-9  | 220 | 1.77 | 1097 | 8084 | 24.7 | > 40 | > 360 | [63] |
| b-10 | 250 | 1.81 | 1165 | 8203 | 27.1 | > 40 | > 360 | [63] |

FS Friction sensitivity

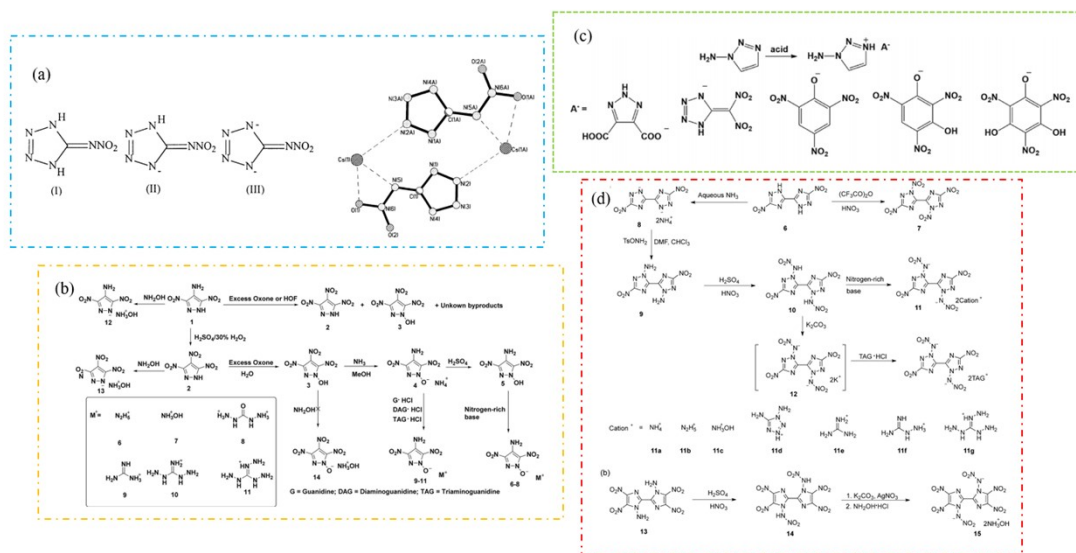

**Figure S17.** Molecular structure of organic ion energetic materials [64-67]. Copyright 2002, 2015, 2017, and 2018 Elsevier and Wiley-VCH Verlag GmbH & Co. KGaA.

**Table S11.** The properties of organic ion energetic compounds.

| Compounds           | T <sub>d</sub> , °C | ρ, g/cm <sup>3</sup> | ΔH <sub>f</sub> , J/g | V <sub>d</sub> , m/s | P <sub>d</sub> , GPa | IS, J | FS, N | Ref. |
|---------------------|---------------------|----------------------|-----------------------|----------------------|----------------------|-------|-------|------|
| b-5H <sub>2</sub> O | 93                  | 1.86                 |                       |                      |                      | 20    | 240   | [65] |
| b-6                 | 216                 | 1.79                 | 840                   | 8935                 | 34.4                 | 25    | 240   | [65] |
| b-7                 | 182                 | 1.86                 | 360                   | 9004                 | 37.6                 | 35    | 360   | [65] |
| b-8                 | 175                 | 1.84                 | 360                   | 8797                 | 34.0                 | 40    | 360   | [65] |
| b-9                 | 204                 | 1.71                 | 50                    | 8200                 | 26.4                 | 40    | 360   | [65] |
| b-10                | 169                 | 1.71                 | 790                   | 8540                 | 28.0                 | 40    | 360   | [65] |
| b-11                | 214                 | 1.75                 | 1150                  | 8877                 | 30.7                 | 40    | 360   | [65] |
| b-12                | 212                 | 1.80                 | 540                   | 8810                 | 33.9                 | 40    | 360   | [65] |
| b-13                | 129                 | 1.86                 | 440                   | 9135                 | 38.0                 | 25    | 240   | [65] |
| c-1                 | 151                 | 1.69                 | -76                   | 6699                 | 19.2                 | 40    |       | [66] |
| c-2                 | 149                 | 1.77                 | 263                   | 7818                 | 26.8                 | 6.5   |       | [66] |
| c-3                 | 148                 | 1.72                 | 408                   | 7742                 | 25.9                 | 40    |       | [66] |
| c-4                 | 162                 | 1.71                 | 204                   | 7687                 | 25.4                 | 40    |       | [66] |

|       |     |      |      |      |      |    |     |      |
|-------|-----|------|------|------|------|----|-----|------|
| c-5   | 131 | 1.87 | 69   | 8231 | 30.7 | 28 |     | [66] |
| d-9   | 271 | 1.83 | 440  | 8677 | 31.8 | 40 | 360 | [67] |
| d-10  | 121 | 1.88 | 592  | 9243 | 38.2 | 3  | 40  | [67] |
| d-11a | 223 | 1.77 | 435  | 8769 | 33.1 | 10 | 120 | [67] |
| d-11b | 170 | 1.81 | 747  | 9170 | 36.4 | 7  | 120 | [67] |
| d-11c | 166 | 1.86 | 536  | 9330 | 39.1 | 8  | 120 | [67] |
| d-11d | 160 | 1.79 | 1668 | 9131 | 35.5 | 5  | 80  | [67] |
| d-11e | 252 | 1.74 | 432  | 8456 | 28.4 | 40 | 360 | [67] |
| d-11f | 197 | 1.72 | 680  | 8570 | 28.9 | 40 | 360 | [67] |
| d-11g | 200 | 1.73 | 1124 | 8927 | 31.3 | 10 | 160 | [67] |
| d-14  | 116 | 1.94 | 481  | 9350 | 40.1 | 3  | 40  | [67] |
| d-15  | 135 | 1.85 | 449  | 9169 | 38.2 | 6  | 80  | [67] |

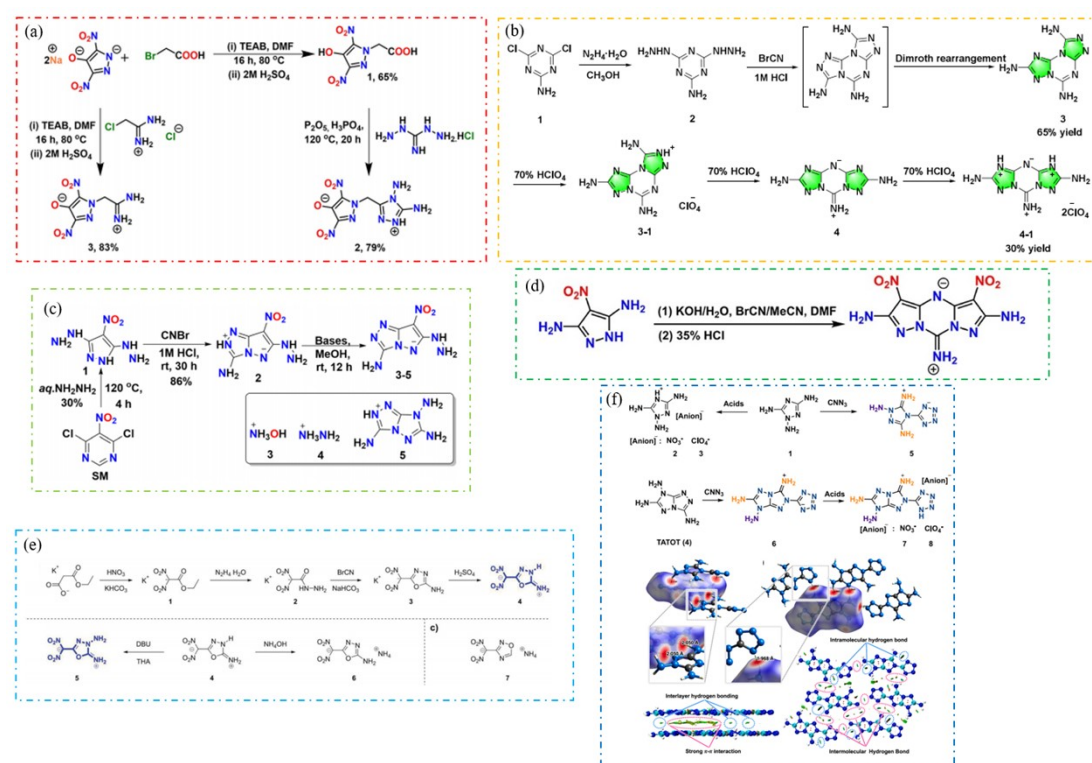

**Figure S18.** Molecular structure of zwitterionic energetic materials [68-73]. Copyright 2020, 2023, and 2024 ACS, RSC and Elsevier.

**Table S12.** The properties of organic ion energetic compounds.

| Compounds | T <sub>d</sub> , °C | ρ, g/cm <sup>3</sup> | ΔH f., kJ/mol | V <sub>d</sub> , m/s | P <sub>d</sub> , GPa | IS, J | FS, N | Ref. |
|-----------|---------------------|----------------------|---------------|----------------------|----------------------|-------|-------|------|
| a-2       | 212                 | 1.79                 | 325.6         | 8085                 | 25.8                 | > 40  | > 360 | [68] |
| a-3       | 270                 | 1.73                 | 60.7          | 7731                 | 23.7                 | > 40  | > 360 | [68] |
| b-3       | 277                 | 1.69                 | 406.3         | 7226                 | 17.1                 | > 40  | > 360 | [68] |

---

|       |     |      |        |      |       |      |       |      |
|-------|-----|------|--------|------|-------|------|-------|------|
| b-3-1 | 325 | 1.81 | 517.5  | 8048 | 26.21 | > 40 | > 360 | [68] |
| b-4   | 294 | 1.73 | 380.3  | 7360 | 17.77 | > 40 | > 360 | [68] |
| b-4-1 | 309 | 1.89 | 428.1  | 8520 | 32.53 | > 40 | > 360 | [68] |
| c-2   | 250 | 1.83 | 361.7  | 8409 | 26.14 | 10   | > 360 | [69] |
| c-3   | 262 | 1.78 | 460.4  | 8956 | 30.29 | 10   | > 360 | [69] |
| c-4   | 171 | 1.77 | 554.5  | 9163 | 31.16 | 10   | > 360 | [69] |
| c-5   | 240 | 1.77 | 948.8  | 8591 | 26.93 | 10   | > 360 | [69] |
| d-1   | 380 | 1.85 | 314.1  | 8390 | 27.2  | > 40 | > 360 | [70] |
| e-4   | 211 | 1.75 | 378.5  | 8027 | 27.5  | 22   | 240   | [71] |
| e-5   | 202 | 1.76 | 417.0  | 8375 | 30.6  | 16   | 200   | [71] |
| e-6   | 121 | 1.76 | 380.7  | 8016 | 28.1  | 9.8  | 120   | [71] |
| e-7   | 250 | 1.64 | 1090.7 | 8897 | 35.2  | 10   | 120   | [71] |
| e-8   | 170 | 1.84 | 480.3  | 9014 | 36.7  | 1.5  | 80    | [71] |
| e-9   | 174 | 1.74 | 448.5  | 8392 | 31.2  | 22   | 260   | [71] |
| f-3   | 235 | 2.05 | -203.2 | 9035 | 33.0  | 10   | 80    | [72] |
| f-4   | 138 | 1.87 | 62.0   | 8828 | 34.6  | 25   | 120   | [72] |
| f-5   | 143 | 1.87 | 139.1  | 8928 | 35.9  | 28   | 128   | [72] |
| f-6   | 202 | 1.78 | -72.2  | 8554 | 30.1  | 20   | 160   | [72] |
| f-7   | 140 | 1.74 | -29.7  | 8554 | 39.4  | 9    | 144   | [72] |

---

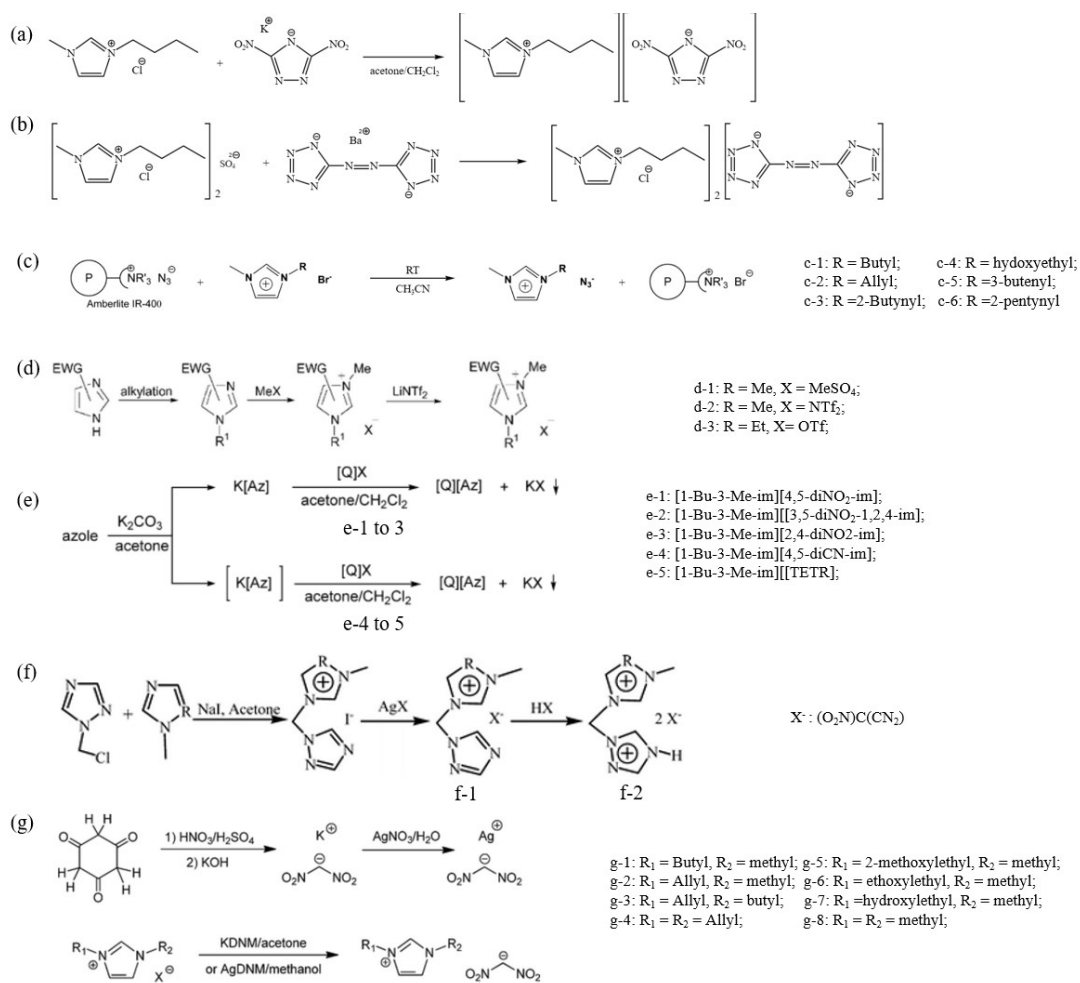

**Figure S19.** Molecular structure of imidazole based energetic ionic liquids.

**Table S13.** The properties of The properties of some imidazole based energetic ionic liquids.

| EILs | T <sub>m</sub> , °C | T <sub>g</sub> , °C | T <sub>d</sub> , °C | ρ, g/cm <sup>3</sup> | ΔH f, kJ/mol | V <sub>d</sub> , m/s | P <sub>d</sub> , GPa | Ref. |
|------|---------------------|---------------------|---------------------|----------------------|--------------|----------------------|----------------------|------|
| a    | 35-36               |                     | 239                 |                      |              |                      |                      | [74] |
| b    | 3                   |                     |                     | 1.26                 | -1006        |                      |                      | [75] |
| c-1  | 36                  | -74                 | 222                 |                      | 304          |                      |                      | [76] |
| c-2  | 36                  | -3                  | 214                 |                      | 167          |                      |                      | [76] |
| c-3  | 19                  | -77                 | 150                 |                      | 448          |                      |                      | [76] |
| c-4  | 45                  | -57                 | 188                 |                      | 423          |                      |                      | [76] |
| c-5  | 66                  |                     | 115                 |                      | 598          |                      |                      | [76] |
| c-6  | 19                  | -55                 | 107                 |                      | 582          |                      |                      | [76] |
| d-1  | 95                  |                     | 166                 | 1.63                 | -            |                      |                      | [77] |
| d-2  | 72                  |                     | 248                 | -                    | -            |                      |                      | [77] |
| d-3  | 92                  |                     | 260                 | 1.68                 | -            |                      |                      | [77] |
| e-1  |                     | -64                 | 241                 | -                    | -            |                      |                      | [78] |
| e-2  | 33                  |                     | 239                 | -                    | -            |                      |                      | [78] |

|     |     |     |      |       |      |      |      |
|-----|-----|-----|------|-------|------|------|------|
| e-3 | -53 | 254 | -    | -     |      |      | [78] |
| e-4 | -74 | 230 | -    | -     |      |      | [78] |
| e-5 | -82 | 208 | -    | -     |      |      | [78] |
| f-1 | 89  | 274 | 1.41 | -     |      |      | [79] |
| f-2 | 95  | 220 | 1.43 | 385.4 | 6063 | 11.1 | [79] |
| g-1 | -83 | 164 | 1.21 |       |      |      | [80] |
| g-2 | -73 | 162 | 1.36 |       |      |      | [80] |
| g-3 | -73 | 164 | 1.18 |       |      |      | [80] |
| g-4 | -79 | 166 | 1.23 |       |      |      | [80] |
| g-5 | -73 | 162 | 1.34 |       |      |      | [80] |
| g-6 | -62 | 154 | 1.38 |       |      |      | [80] |
| g-7 | -67 | 158 | 1.38 |       |      |      | [80] |
| g-8 | 60  | 177 | 1.45 |       |      |      | [80] |

$T_m$  Melting point,  $T_g$  Glass transition temperature.

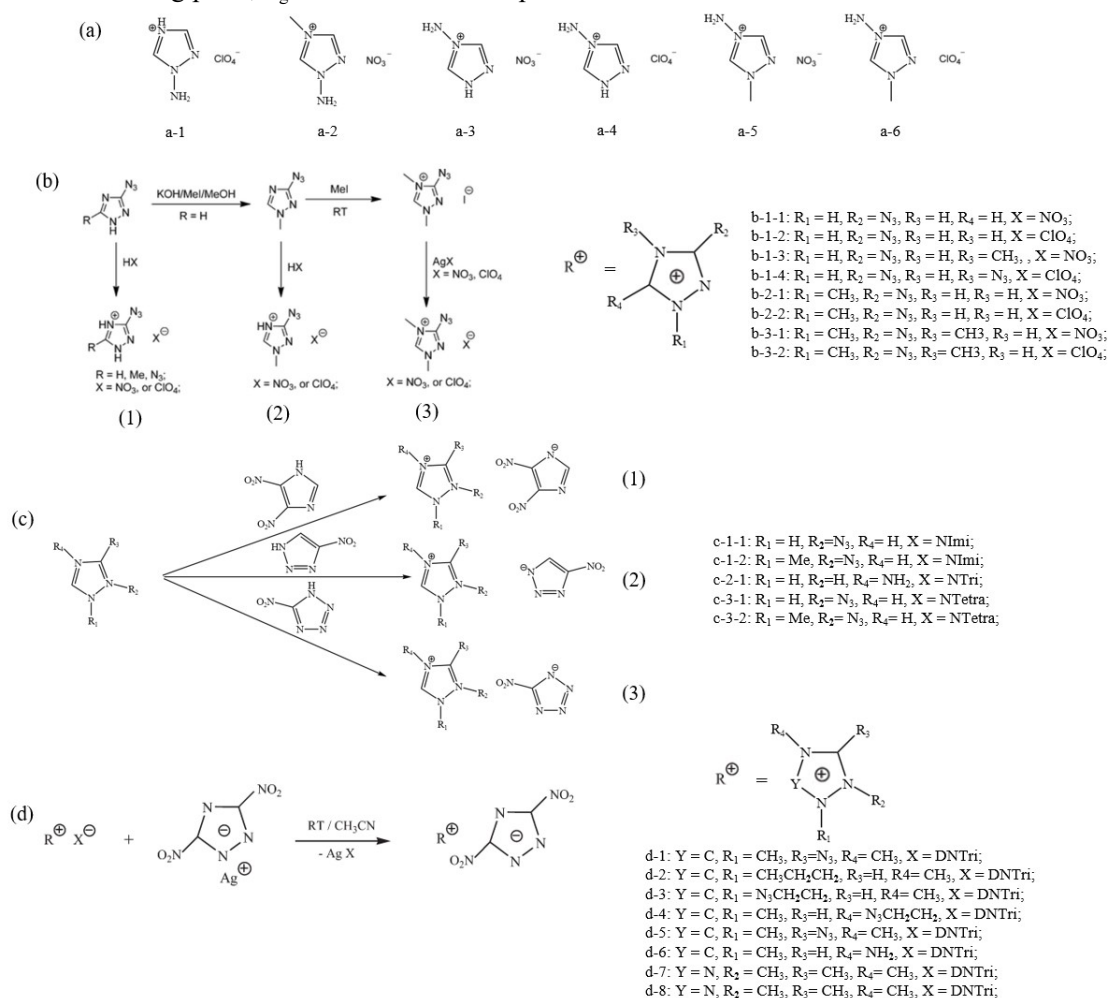

**Figure S20.** Molecular structure of triazole imidazole based energetic ionic liquids.

**Table S14.** The properties of some triazole imidazole based energetic ionic liquids.

| EILs  | T <sub>m</sub> , °C | T <sub>g</sub> , °C | T <sub>d</sub> , °C | ρ, g/cm <sup>3</sup> | ΔH f., kJ/mol | V <sub>d</sub> , m/s | P <sub>d</sub> , GPa | Ref. |
|-------|---------------------|---------------------|---------------------|----------------------|---------------|----------------------|----------------------|------|
| a-1   | 91                  |                     | 235                 | 1.80                 | 357.01        |                      |                      | [81] |
| a-2   |                     | -62                 | 217                 | 1.51                 | -174.68       |                      |                      | [81] |
| a-3   | 69                  |                     | 181                 | 1.64                 | -109.79       |                      |                      | [81] |
| a-4   | 83                  |                     | 208                 |                      | 298.43        |                      |                      | [81] |
| a-5   |                     | -60                 | 221                 | 1.55                 | -187.36       |                      |                      | [81] |
| a-6   | 86                  |                     | 259                 | 1.66                 | 215.17        |                      |                      | [81] |
| b-1-1 | 147                 |                     | 174                 | 1.76                 | 218.65        |                      |                      | [82] |
| b-1-2 | 123                 |                     | 154                 | -                    | -             |                      |                      | [82] |
| b-1-3 | 118                 |                     | 136                 | 1.68                 | 156.38        |                      |                      | [82] |
| b-1-4 | 97                  |                     | 136                 |                      |               |                      |                      | [82] |
| b-2-1 | 66                  |                     | 139                 | 1.63                 | 93.35         |                      |                      | [82] |
| b-2-2 | 55                  |                     | 147                 | 1.66                 | 574.73        |                      |                      | [82] |
| b-3-1 | 68                  |                     | 147                 |                      |               |                      |                      | [82] |
| b-3-1 | 98                  |                     | 129                 |                      |               |                      |                      | [82] |
| c-1-1 | 92                  |                     | 158                 | 1.70                 | 401.85        |                      |                      | [83] |
| c-1-2 | 80                  |                     | 148                 | 1.60                 | 700.69        |                      |                      | [83] |
| c-2-1 | 64                  |                     | 198                 | 1.50                 | 141.38        |                      |                      | [83] |
| c-3-1 |                     | -35                 | 161                 | 1.53                 | 965.20        |                      |                      | [83] |
| c-3-2 |                     | -38                 | 141                 | 1.45                 | 1070.68       |                      |                      | [83] |
| d-1   | 97                  |                     | 239                 | 1.86                 | 118.1         |                      |                      | [84] |
| d-2   | 61                  |                     | 231                 | 1.51                 | 198.7         |                      |                      | [84] |
| d-3   | 88                  |                     | 189                 | 1.61                 | 395.2         |                      |                      | [84] |
| d-4   |                     | -43                 | 179                 | 1.71                 | 771.3         |                      |                      | [84] |
| d-5   |                     | -22                 | 118                 | 1.60                 | 778.1         |                      |                      | [84] |
| d-6   | 112                 |                     | 234                 | 1.70                 | 378.3         |                      |                      | [84] |
| d-7   | 173                 |                     | 199                 | 1.72                 | 161.4         |                      |                      | [84] |
| d-8   | 141                 |                     | 166                 | 1.64                 | 660.3         |                      |                      | [84] |

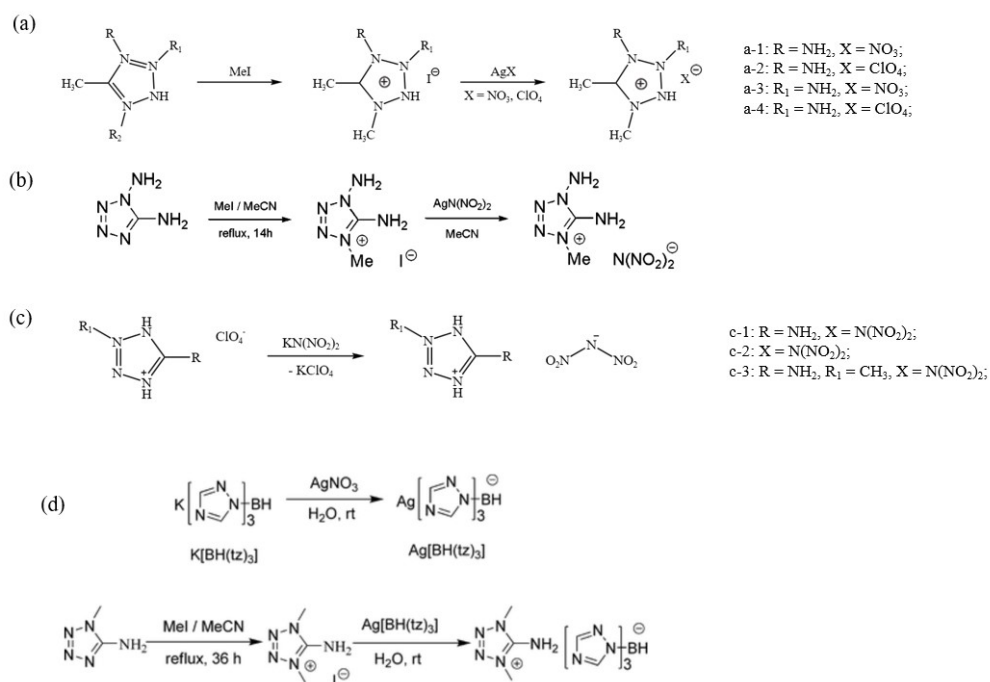

**Figure S21.** Molecular structure of tetrazolimidazole based energetic ionic liquids.

**Table S15.** The properties of some tetrazolimidazole based energetic ionic liquids.

| EILs | T <sub>m</sub> , °C | T <sub>g</sub> , °C | T <sub>d</sub> , °C | ρ, g/cm <sup>3</sup> | ΔH f,,<br>kJ/mol | V <sub>d</sub> , m/s | P <sub>d</sub> , GPa | IS, J | FS, J | Ref. |
|------|---------------------|---------------------|---------------------|----------------------|------------------|----------------------|----------------------|-------|-------|------|
| a-1  | -                   | -59                 | 170                 | 1.55                 | 129.52           |                      |                      |       |       | [81] |
| a-2  | 51                  |                     | 182                 | 1.71                 | 538.53           |                      |                      |       |       | [81] |
| a-3  | 94                  |                     | 173                 | 1.55                 | 163.41           |                      |                      |       |       | [81] |
| a-4  | 140                 |                     | 238                 | 1.71                 | 911.21           |                      |                      |       |       | [81] |
| b    | 85                  |                     | 150                 |                      |                  |                      |                      |       | 24    | [85] |
| c-1  | 85                  |                     | 117                 | 1.86                 | 329              | 9429                 | 38.4                 | 2     | 20    | [86] |
| c-2  | 70                  |                     | 110                 | 1.82                 | 367              | 9215                 | 36.5                 | 2     | 28    | [86] |
| c-3  | 90                  |                     | 145                 | 1.66                 | 296              | 8548                 | 29.0                 | 5     | 64    | [86] |
| d    | 11.8                |                     | 81.7                | 12.4                 |                  |                      |                      |       |       | [87] |

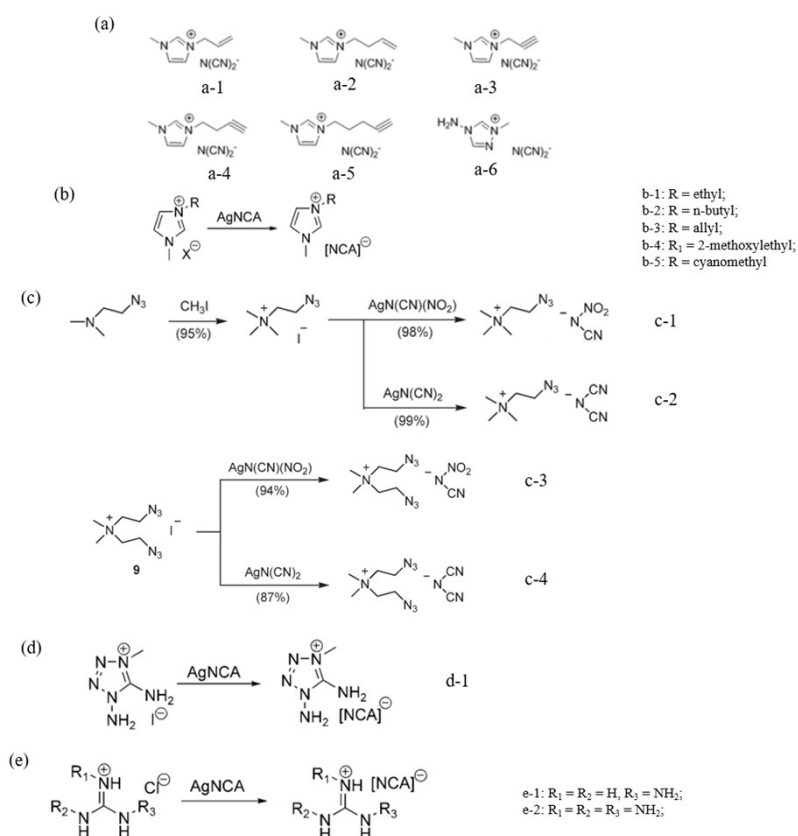

**Figure S22.** Molecular structure of tetrazolimidazole based energetic ionic liquids.

**Table S16.** The properties of some hypergolic ionic liquids.

| EILs | T <sub>g</sub> , °C | T <sub>d</sub> , °C | ρ, g/cm <sup>3</sup> | η, cP | ΔH <sub>f</sub> , kJ/mol | ΔH <sub>c</sub> , kJ/mol | ID, ms | I <sub>sp</sub> | Ref. |
|------|---------------------|---------------------|----------------------|-------|--------------------------|--------------------------|--------|-----------------|------|
| a-1  | -85                 | 207                 |                      | 42    |                          |                          | 43     |                 | [88] |
| a-2  | -90                 | 210                 |                      | 27    |                          |                          |        |                 | [88] |
| a-3  | -61                 | 144                 |                      | 110   |                          |                          | 15     |                 | [88] |
| a-4  |                     | 179                 |                      |       |                          |                          |        |                 | [88] |
| a-5  |                     | 184                 |                      |       |                          |                          |        |                 | [88] |
| a-6  | -66                 | 143                 |                      | 92    |                          |                          | 31     |                 | [88] |
| b-1  | -73                 | 253                 | 1.18                 | 23    | 157.7                    |                          | 78     | 192.3           | [89] |
| b-2  | -90                 | 256                 | 1.13                 | 57    | 128.5                    |                          | 81     | 184.6           | [89] |
| b-3  | -91                 | 220                 | 1.11                 | 44    | 274.7                    |                          | 46     | 196.7           | [89] |
| b-4  | -82                 | 266                 | 1.21                 | 54    | 44.3                     |                          | 65     | 187.0           | [89] |
| b-5  |                     | 203                 | 1.47                 |       | 368.9                    |                          |        | 203.2           | [89] |
| c-1  |                     | 245                 | 1.24                 |       | 380                      |                          | 8      | 218             | [90] |
| c-2  |                     | 235                 | 1.15                 |       | 518                      |                          | 20     | 202             | [90] |
| c-3  |                     | 222                 | 1.32                 |       | 752                      |                          | 226    | 231             | [90] |

|     |     |      |       |    |       |      |
|-----|-----|------|-------|----|-------|------|
| c-4 | 222 | 1.21 | 894   | 16 | 231   | [90] |
| d-1 | -47 | 188  | 409   |    | 225.  | [89] |
| e-1 | 91  | 223  | 138.2 |    | 212.2 | [89] |
| e-2 | 74  | 209  | 322.8 |    | 227.0 | [89] |

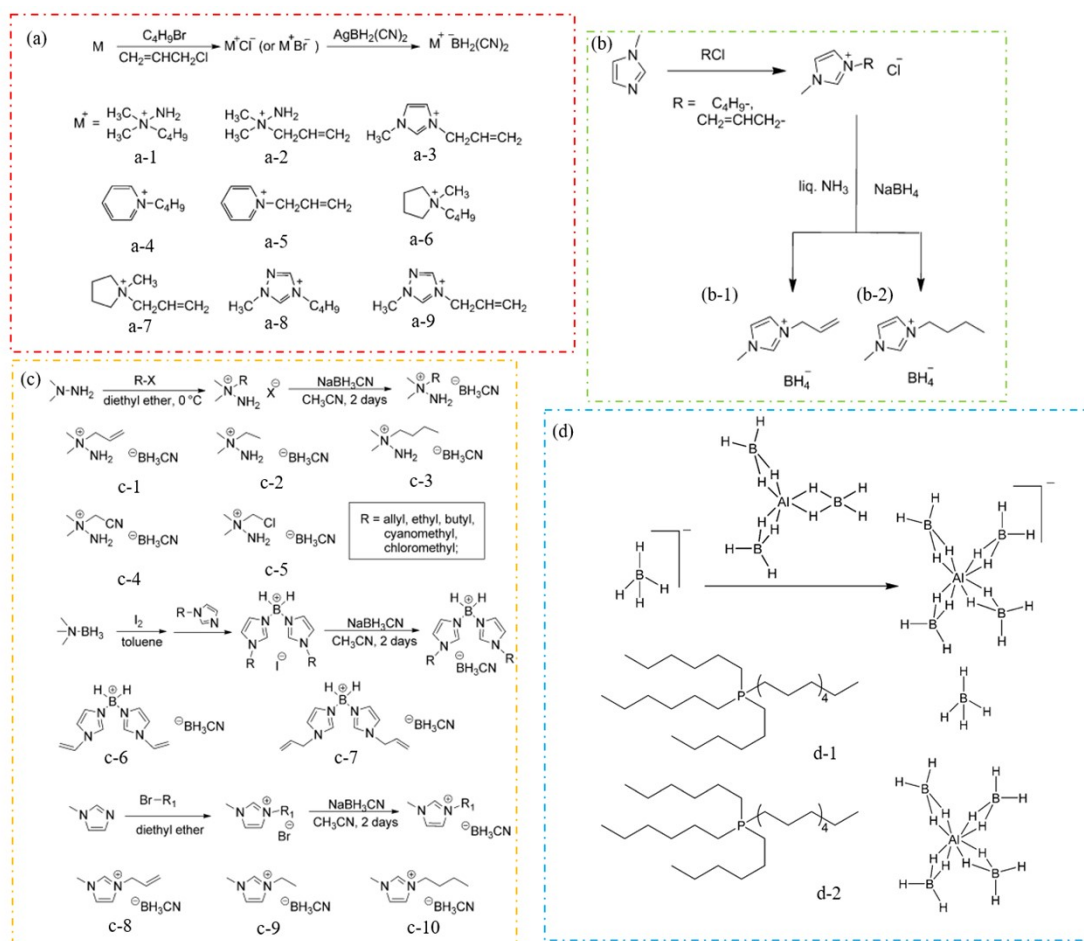

**Figure S23.** Molecular structure of HILs incorporating B–H-containing anions.

**Table S17.** The properties of some HILs incorporating B–H-containing anions.

| EILs | T <sub>g</sub> , °C | T <sub>d</sub> , °C | ρ, g/cm <sup>3</sup> | η, cP | ΔH <sub>f</sub> , kJ/mol | ΔH <sub>c</sub> , kJ/mol | ID, ms | I <sub>sp</sub> | Ref. |
|------|---------------------|---------------------|----------------------|-------|--------------------------|--------------------------|--------|-----------------|------|
| a-1  | <-80                | 222                 | 0.91                 | 39.4  |                          |                          | 6      |                 | [91] |
| a-2  | <-80                | 189                 | 0.93                 | 35.0  |                          |                          | 4      |                 | [91] |
| a-3  | <-80                | 266                 | 0.99                 | 12.4  |                          |                          | 8      |                 | [91] |
| a-4  | <-80                | 252                 | 0.96                 | 19.8  |                          |                          | 18     |                 | [91] |
| a-5  | <-80                | 203                 | 1.00                 | 13.5  |                          |                          | 6      |                 | [91] |
| a-6  | <-80                | 303                 | 0.92                 | 22.3  |                          |                          | 26     |                 | [91] |
| a-7  | <-80                | 259                 | 0.94                 | 16.6  |                          |                          | 8      |                 | [91] |
| a-8  | <-80                | 220                 | 0.99                 | 29.9  |                          |                          | 32     |                 | [91] |

|      |      |      |      |       |     |       |     |     |      |
|------|------|------|------|-------|-----|-------|-----|-----|------|
| a-9  | <-80 | 217  | 1.03 | 21.0  |     |       | 6   |     | [91] |
| b-1  | <-60 | 93.3 | 0.90 | 113.8 | 118 | -5653 | 3   |     | [92] |
| b-2  | <-60 | 99.9 | 0.91 | 486.6 | 39  | -6539 | 38  |     | [92] |
| c-1  | -80  | 181  | 0.93 | 113   | 155 | -5439 | 42  | 214 | [93] |
| c-2  | -17  | 205  | 0.92 | 242   | 40  | -4931 | 103 | 208 | [93] |
| c-3  | -80  | 201  | 0.89 | 124   | 20  | -6270 | 54  | 198 | [93] |
| c-4  |      | 127  | 0.94 |       | 282 | -4744 |     | 228 | [93] |
| c-5  |      | 134  | 1.15 |       | 58  | -4127 |     | 204 | [93] |
| c-6  | -37  | 174  | 0.89 | 523   | 573 | -8605 | 41  | 219 | [93] |
| c-7  | -59  | 190  | 0.88 | 196   | 245 | -9635 | 23  | 188 | [93] |
| c-8  | -80  | 242  | 0.96 | 28    | 337 | -6122 | 8   | 211 | [93] |
| c-9  | -71  | 247  | 0.98 | 19    | 319 | -5610 | 4   | 206 | [93] |
| c-10 | -80  | 267  | 0.97 | 102   | 191 | -6941 | 24  | 195 | [93] |

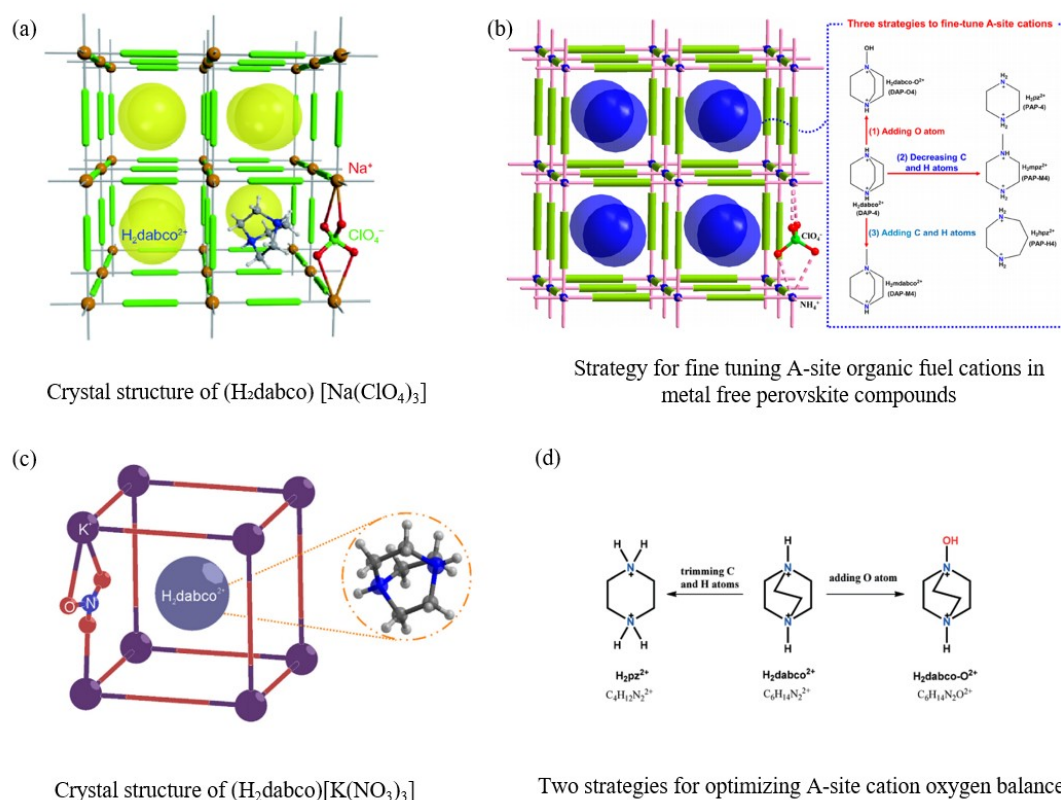

**Figure S24.** Perovskite-inspired energetic materials<sup>[94-97]</sup>. Copyright 2018, 2020, and 2022 Springer Nature, ACS, RSC, and KeAi.

**Table S18.** The properties of some HILs incorporating B–H-containing anions.

| Compounds | T <sub>d</sub> , °C | T <sub>p</sub> , °C | ρ,<br>g/cm <sup>3</sup> | ΔH <sub>f</sub> ,<br>kJ/mol | Q,<br>kJ/g | V <sub>d</sub> ,<br>m/s | P <sub>d</sub> ,<br>GPa | IS,<br>J | FS,<br>N | Isp,<br>s | Ref. |
|-----------|---------------------|---------------------|-------------------------|-----------------------------|------------|-------------------------|-------------------------|----------|----------|-----------|------|
|-----------|---------------------|---------------------|-------------------------|-----------------------------|------------|-------------------------|-------------------------|----------|----------|-----------|------|

|        |     |     |      |        |       |      |       |    |      |     |      |
|--------|-----|-----|------|--------|-------|------|-------|----|------|-----|------|
| DAP-1  | 344 | 361 | 2.02 | 1013.7 | 8.89  | 9306 | 48.3  | 17 | 36   | -   | [94] |
| DAP-2  | 364 | 377 | 2.04 | 247.3  | 7.09  | 9224 | 44.2  | 16 | 42   | -   | [94] |
| DAP-3  | 352 | 369 | 2.16 | -      | -     | -    | -     | 22 | 28   | -   | [94] |
| DAP-4  | 365 | 383 | 1.87 | 1904.2 | 10.38 | 9588 | 49.4  | 23 | 36   | 344 | [94] |
| DAP-O4 | 352 | -   | 1.85 | 436.0  | 6.21  | 8900 | 35.7  |    |      | 262 | [95] |
| DAP-M4 | 364 |     | 1.78 | 839.1  | 4.99  | 8085 | 28.8  |    |      | 225 | [95] |
| PAP-4  | 288 |     | 1.74 | 537.7  | 6.00  | 8629 | 32.4  |    |      | 264 | [95] |
| PAP-M4 | 323 |     | 1.77 | 859.9  | 5.14  | 8311 | 30.3  |    |      | 241 | [95] |
| PAP-H4 | 348 |     | 1.83 | 600.4  | 5.76  | 8756 | 34.3  |    |      | 255 | [95] |
| PAP-5  | 342 |     | 2.50 |        | 4.88  | 8961 | 42.4  |    |      |     | [98] |
| PAP-M5 | 307 |     | 2.37 |        | 5.42  | 8778 | 39.7  |    |      |     | [98] |
| PAP-H5 | 328 |     | 2.37 |        | 5.36  | 8756 | 39.5  |    |      |     | [98] |
| DAN-2  | -   | -   | 1.68 | 339.1  | 5.43  | 7566 | 23.4  | 29 | >360 |     | [96] |
| DAI-1  | 152 |     | 2.90 | 83.31  | 3.58  | 6438 | 30.79 |    |      | <5  | [99] |
| DAI-2  | 165 |     | 2.95 | 118.5  | 3.48  | 6331 | 30.88 |    |      | <5  | [99] |
| DAI-3  | 156 |     | 3.06 |        |       |      |       |    |      | <5  | [99] |
| DAI-4  | 155 |     | 2.79 | 36.9   | 3.41  | 6558 | 30.69 |    |      | <5  | [99] |

DAP-1: (H<sub>2</sub>dabco)[Na(ClO<sub>4</sub>)<sub>3</sub>], DAP-2: (H<sub>2</sub>dabco) [K(ClO<sub>4</sub>)<sub>3</sub>], DAP-3: (H<sub>2</sub>dabco) [Rb(ClO<sub>4</sub>)<sub>3</sub>],  
DAP-4: (H<sub>2</sub>dabco) [NH<sub>4</sub>(ClO<sub>4</sub>)<sub>3</sub>], DAP-O4: (H<sub>2</sub>dabco-O<sup>2+</sup>) [NH<sub>4</sub>(ClO<sub>4</sub>)<sub>3</sub>], DAP-M4:  
(H<sub>2</sub>mdabco) [NH<sub>4</sub>(ClO<sub>4</sub>)<sub>3</sub>], PAP-4: (H<sub>2</sub>pz) [NH<sub>4</sub>(ClO<sub>4</sub>)<sub>3</sub>], PAP-M4: (H<sub>2</sub>mpz) [NH<sub>4</sub>(ClO<sub>4</sub>)<sub>3</sub>],  
PAP-H4: (H<sub>2</sub>hpz) [NH<sub>4</sub>(ClO<sub>4</sub>)<sub>3</sub>], PAP-5: (H<sub>2</sub>pz) [Ag (ClO<sub>4</sub>)<sub>3</sub>], PAP-M5: (H<sub>2</sub>mpz) [Ag (ClO<sub>4</sub>)<sub>3</sub>],  
PAP-H5: (H<sub>2</sub>hpz) [Ag (ClO<sub>4</sub>)<sub>3</sub>], DAN-2: (H<sub>2</sub>dabco)[K(NO<sub>3</sub>)<sub>3</sub>], DAI-1: (H<sub>2</sub>dabco)[Na(IO<sub>4</sub>)<sub>3</sub>], DAI-  
2: (H<sub>2</sub>dabco)[K(IO<sub>4</sub>)<sub>3</sub>], DAI-3: (H<sub>2</sub>dabco)[Rb(IO<sub>4</sub>)<sub>3</sub>], DAI-4: (H<sub>2</sub>dabco)[NH<sub>4</sub>(IO<sub>4</sub>)<sub>3</sub>].

## Energetic coordination compounds

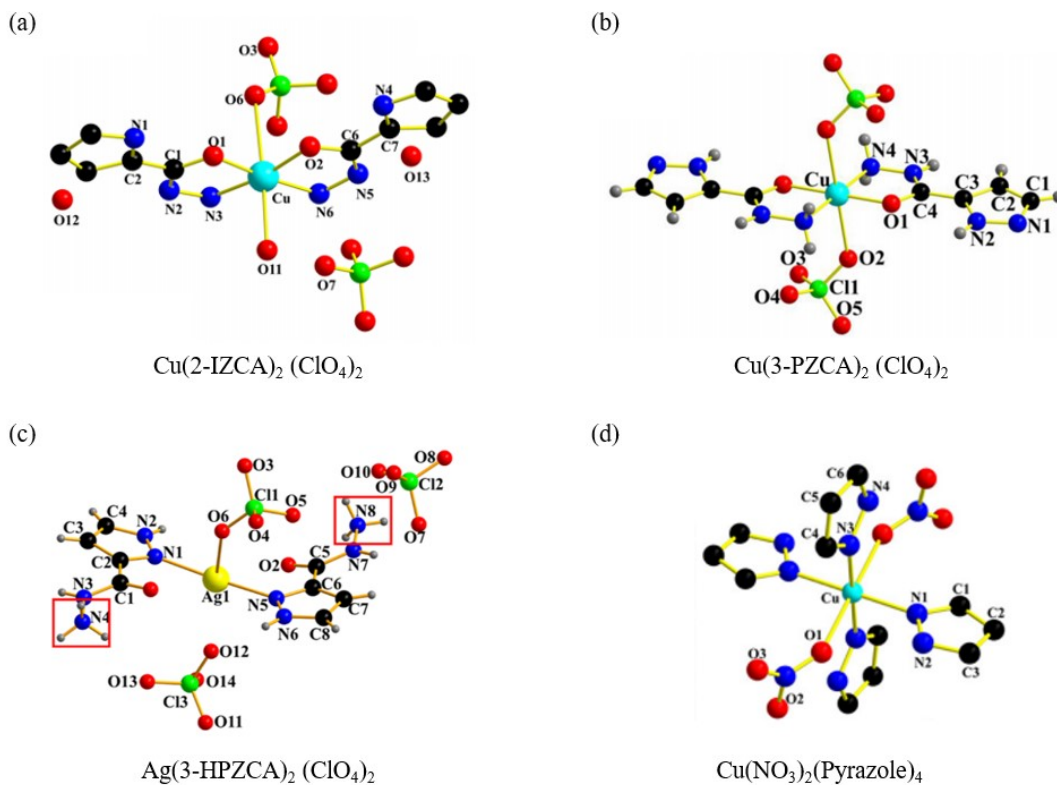

**Figure S25.** Molecular structure of some zero-dimensional ECCs [100-103]. Copyright 2023, 2024, and 2025 ACS and RSC.

**Table S19.** The properties of some zero-dimensional ECCs.

| Compounds                                                     | T <sub>d</sub> , °C | ρ, g/cm <sup>3</sup> | ΔH <sub>f</sub> ,<br>kJ/mol | V <sub>d</sub> , m/s | P <sub>d</sub> , GPa | IS, J | FS, N | Ref.  |
|---------------------------------------------------------------|---------------------|----------------------|-----------------------------|----------------------|----------------------|-------|-------|-------|
| Cu(PRCA) <sub>2</sub><br>(ClO <sub>4</sub> ) <sub>2</sub>     | 219                 | 1.83                 |                             | 6300                 | 16.4                 | 7     | 16    | [100] |
| Cu(3-<br>PZCA) <sub>2</sub> (ClO <sub>4</sub> ) <sub>2</sub>  | 190                 | 1.96                 |                             | 7100                 | 23.5                 | 2     | 7     | [101] |
| Cu(2-<br>IZCA) <sub>2</sub> (ClO <sub>4</sub> ) <sub>2</sub>  | 225                 | 1.94                 |                             | 7100                 | 22.1                 | 3     | 8     | [101] |
| Ag(3-<br>HPZCA) <sub>2</sub> (ClO <sub>4</sub> ) <sub>3</sub> | 258                 | 2.09                 |                             | 7600                 | 28.5                 | 13    | 40    | [102] |
| Cu(NO <sub>3</sub> ) <sub>2</sub> (Pyz) <sub>4</sub>          | 208                 | 1.61                 | 88.1                        | 6138                 | 13.2                 | 40    | 360   | [103] |
| Cu(NO <sub>3</sub> ) <sub>2</sub> (CPyz) <sub>4</sub>         | 222                 | 1.78                 | 29.8                        | 5780                 | 15.3                 | 40    | 360   | [103] |
| Cu(ClO <sub>4</sub> ) <sub>2</sub> (Pyz) <sub>4</sub>         | 237                 | 1.72                 | 281.7                       | 6215                 | 16.8                 | 14    | 192   | [103] |
| Cu(ClO <sub>4</sub> ) <sub>2</sub> (CPyz) <sub>4</sub>        | 268                 | 1.81                 | 248.9                       | 6190                 | 17.8                 | 10    | 168   | [103] |

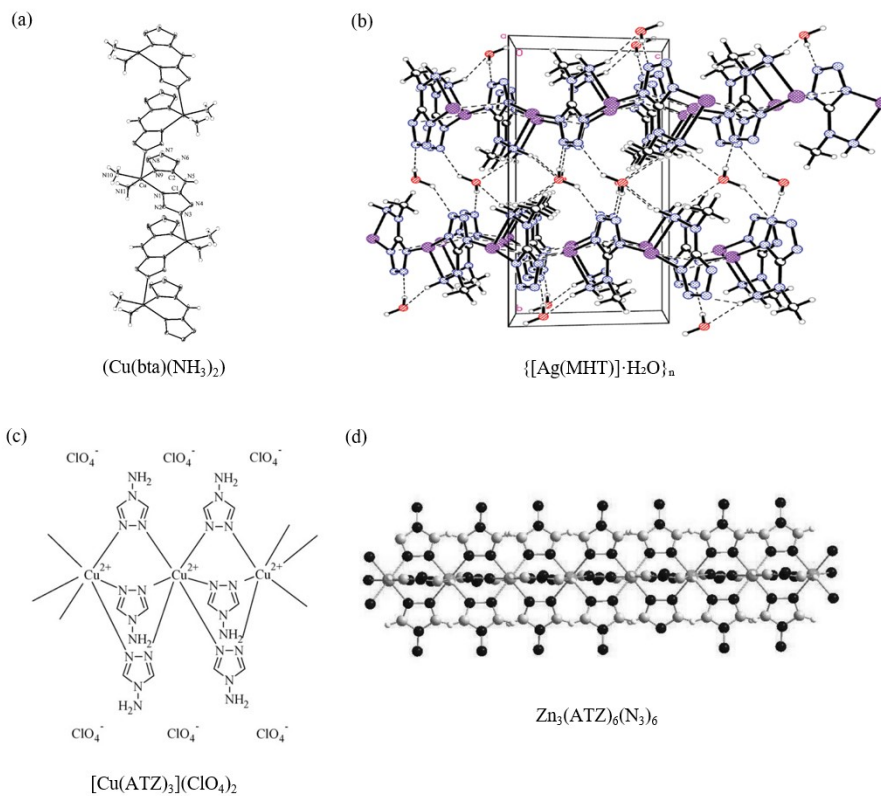

**Figure S26.** Molecular structure of some one-dimensional ECCs [104-107]. Copyright 2005, 2010, 2012, and 2013 ACS, Elsevier, and Wiley.

**Table S20.** The properties of some one-dimensional ECCs.

| Compounds                                                       | $T_d$ , °C | $\rho$ , g/cm <sup>3</sup> | $\Delta H_f$ ,<br>kJ/mol | $V_d$ , m/s | $P_d$ , GPa | IS, J | FS, N | Ref.  |
|-----------------------------------------------------------------|------------|----------------------------|--------------------------|-------------|-------------|-------|-------|-------|
| $\text{Cu}(\text{bta})(\text{NH}_3)_2 \cdot \text{H}_2\text{O}$ | 250        | 2.00                       | 87.8                     |             |             | >40   | >360  | [104] |
| $[\text{Ag}(\text{MHT})] \cdot \text{H}_2\text{O}$              | 200        | 2.47                       | -263                     |             |             | >40   |       | [105] |
| $[\text{Cu}(\text{ATZ})_3](\text{ClO}_4)_2$                     | >250       | 1.4                        |                          | 6500        |             | 1     | 8.8   | [106] |
| $\text{Zn}_3(\text{ATZ})_6(\text{N}_3)_6$                       | 137        | 1.82                       |                          |             |             | >40   |       | [107] |
| $\text{Ni}(\text{N}_2\text{H}_4)_5(\text{ClO}_4)_2$             | 220        | 1.98                       |                          | 9200        | 36.8        |       |       | [108] |
| $\text{Co}(\text{N}_2\text{H}_4)_5(\text{ClO}_4)_2$             | 194        | 1.95                       |                          | 8225        | 31.7        | 0.5   |       | [108] |
| $\text{Ni}(\text{N}_2\text{H}_4)_3(\text{NO}_3)_2$              | -          | 2.16                       |                          | 7300        | 20.2        |       |       | [108] |

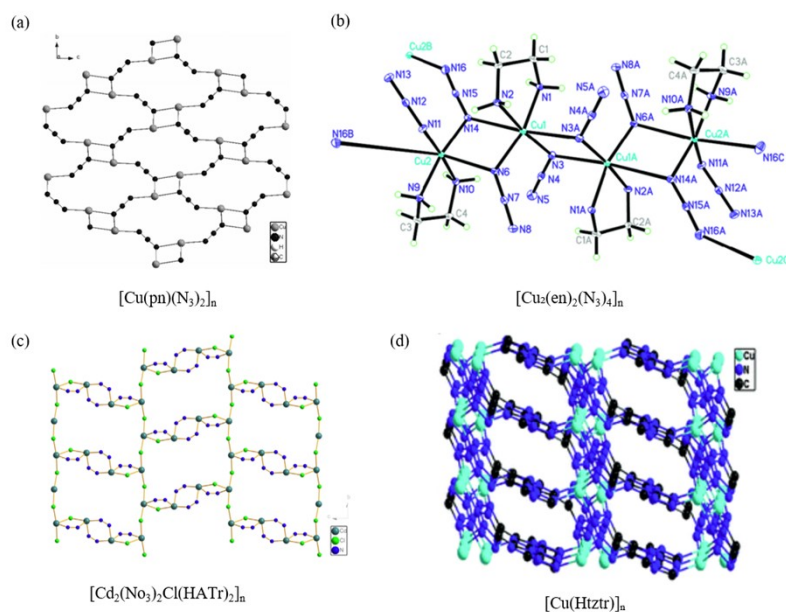

**Figure S27.** Molecular structure of some two-dimensional ECCs [109-112]. Copyright 2013 and 2015 Wiley, RSC and Elsevier.

**Table S21.** The properties of some two-dimensional ECCs.

| Compounds                                              | $T_d$ , °C | $\rho$ , g/cm <sup>3</sup> | $\Delta H_f$ ,<br>kJ/mol | $V_d$ , m/s | $P_d$ , GPa | IS, J | FS, N | Ref.  |
|--------------------------------------------------------|------------|----------------------------|--------------------------|-------------|-------------|-------|-------|-------|
| $\text{Cu}(\text{pn})(\text{N}_3)_2$                   | 215.7      | 1.76                       | -2320.76                 |             |             | 2.55  |       | [109] |
| $\text{Cu}_2(\text{en})_2(\text{N}_3)_4$               | 201.8      | 1.93                       | -1330.34                 |             |             | 7.84  |       | [110] |
| $\text{Cd}_2(\text{NO}_3)_2\text{Cl}_2(\text{HATr})_2$ | 224.85     | 2.47                       |                          |             |             |       |       | [111] |
| $\text{Cu}(\text{Htztr})$                              | 200        | 2.03                       | 93                       |             |             | >40   |       | [112] |

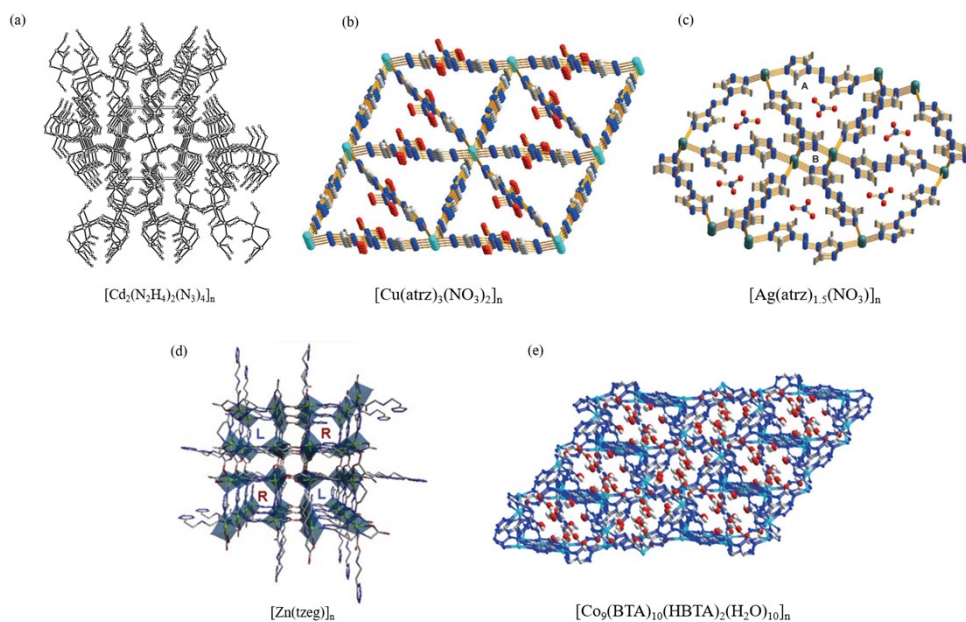

**Figure S28.** Molecular structure of some three-dimensional ECCs [113-116]. Copyright 2008, 2013,

and 2014 Elsevier, RSC and Wiley.

**Table S22.** The properties of some two-dimensional ECCs.

| Compounds                                 | $T_d$ , °C | $\rho$ , g/cm <sup>3</sup> | $\Delta H_f$ ,<br>kJ/mol | $V_d$ , m/s | $P_d$ , GPa | IS, J | FS, N | Ref.  |
|-------------------------------------------|------------|----------------------------|--------------------------|-------------|-------------|-------|-------|-------|
| $Cd_2(N_2H_4)_2(N_3)_4$                   | 151        | 2.64                       |                          |             |             | >40   |       | [113] |
| Zn(tzeg)                                  | 425        | 1.88                       | -491.78                  |             |             |       |       | [114] |
| $Cu(atrz)_3(NO_3)_2$                      | 243        | 1.68                       |                          | 9160        | 35.68       | 22.5  |       | [115] |
| $Ag(atrz)_{1.5}(NO_3)$                    | 257        | 2.16                       |                          | 7773        | 29.70       | 30    |       | [115] |
| $Co_9(BTA)_{10}(HBT$<br>$A)_2(H_2O)_{10}$ | 253        | 1.71                       | 859.66                   | 8657        | 32.18       | 27    | >360  | [116] |

### Metal and Non-metal Fuel

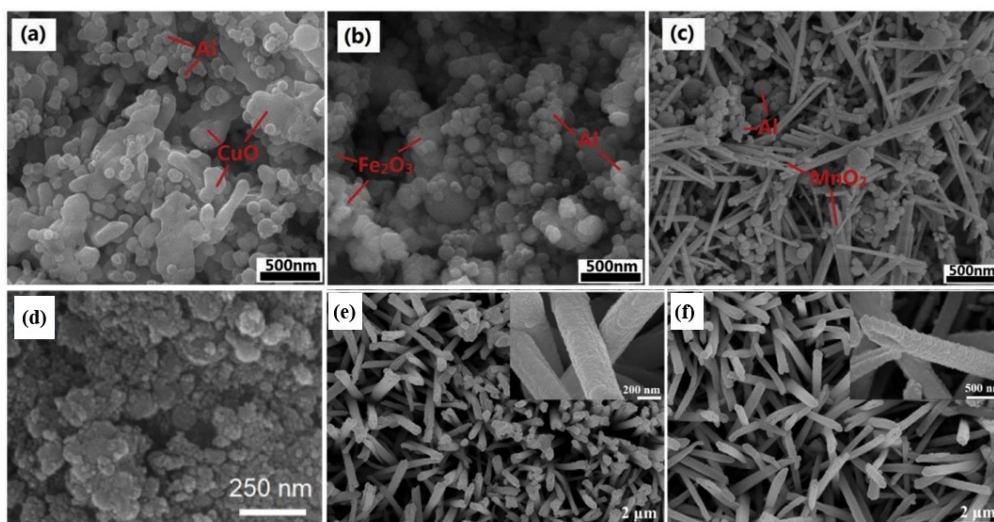

**Figure S29.** The SEM images of thermites (a) Al/CuO nanothermite, (b) Al/Fe<sub>2</sub>O<sub>3</sub> nanothermite, (c) Al/MnO<sub>2</sub> nanothermite<sup>[117]</sup>, Copyright 2020 Elsevier. (d) Field emission scanning electron microscopy (FESEM) image of Al/Fe<sub>2</sub>O<sub>3</sub> nEMs by soft template self-assembly with sol-gel process<sup>[118]</sup>, Copyright 2015 Elsevier (e) CuO nanorod/Al MICs and (f) CuO nanotube/Al MICs<sup>[119]</sup>, Copyright 2018 Elsevier.

**Table S23.** Thermo-physical properties of various thermite reactions<sup>[120]</sup>.

| Reactants                          |                                 | Adiabatic reaction<br>temperature<br>(without phase<br>changes)[K] | Gas production           |               | Heat of reaction |                       |
|------------------------------------|---------------------------------|--------------------------------------------------------------------|--------------------------|---------------|------------------|-----------------------|
| Constituents                       | Density[g/c<br>m <sup>3</sup> ] |                                                                    | Moles of<br>gas/100<br>g | g of<br>gas/g | [kJ/g]           | [kJ/cm <sup>3</sup> ] |
| 2Al+Cr <sub>2</sub> O <sub>3</sub> | 4.190                           | 2789                                                               | 0                        | 0             | 2.6              | 10.9                  |
| 2Al+3CuO                           | 5.109                           | 5718                                                               | 0.5400                   | 0.3431        | 4.1              | 20.8                  |

|                                     |       |      |        |        |     |      |
|-------------------------------------|-------|------|--------|--------|-----|------|
| 2Al+3Cu <sub>2</sub> O              | 5.280 | 4132 | 0.1221 | 0.0776 | 2.4 | 12.7 |
| 2Al+Fe <sub>2</sub> O <sub>3</sub>  | 4.175 | 4382 | 0.1404 | 0.0784 | 4.0 | 16.5 |
| 8Al+3Fe <sub>3</sub> O <sub>4</sub> | 4.264 | 4075 | 0.0549 | 0.0307 | 3.7 | 15.7 |
| 4Al+3MnO <sub>2</sub>               | 4.014 | 4829 | 0.8136 | 0.4470 | 4.8 | 19.5 |
| 2Al+ MoO <sub>2</sub>               | 3.808 | 5574 | 0.2425 | 0.2473 | 4.7 | 17.9 |
| 4Al+ 3SnO <sub>2</sub>              | 5.356 | 5019 | 0.2928 | 0.3476 | 2.9 | 15.4 |
| 10Al+3V <sub>2</sub> O <sub>5</sub> | 3.107 | 3953 | 0.0699 | 0.0356 | 4.6 | 14.2 |
| 4Al+3WO <sub>2</sub>                | 8.085 | 4176 | 0.0662 | 0.0675 | 2.1 | 16.9 |
| 2Al+WO <sub>3</sub>                 | 5.458 | 5544 | 0.1434 | 0.1463 | 2.9 | 15.9 |

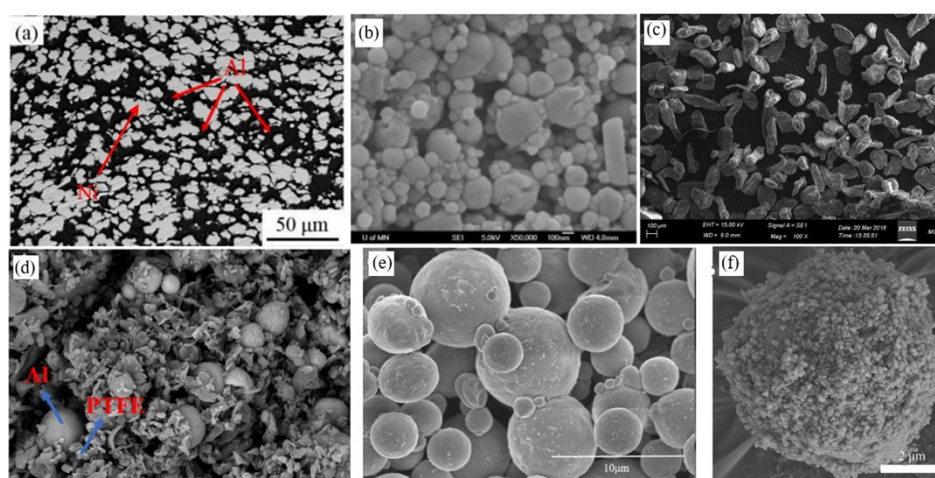

**Figure S30.** The SEM images of thermites (a) Ni-Al energetic material<sup>[121]</sup>, Copyright 2024 ACS. (b) KMnO<sub>4</sub>-Al energetic material<sup>[122]</sup>, Copyright 2005 Wiley (c) Mg-Al energetic material<sup>[123]</sup>, Copyright 2024 IOP Publishing (d) Al/PTFE energetic material<sup>[124]</sup>, Copyright 2023 Elsevier (e) μAl@2.5% PFPE energetic material<sup>[125]</sup>, Copyright 2023 Elsevier (f) the PTFE-coated Al particle of core-shell structured PTFE/Al<sup>[126]</sup>, Copyright 2022 Elsevier.

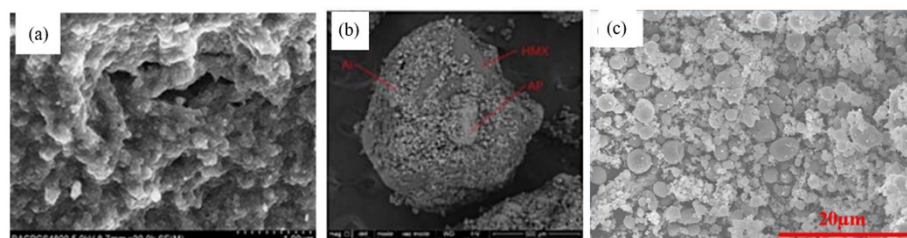

**Figure S31.** The SEM images of thermites (a) AP/Al/Fe<sub>2</sub>O<sub>3</sub> energetic material<sup>[127]</sup>, Copyright 2014 Springer (b) Al/AP/HMX energetic material<sup>[128]</sup>, Copyright 2024 Wiley (c) Al/Ti/CuO-P energetic material<sup>[129]</sup>, Copyright 2023 Elsevier.

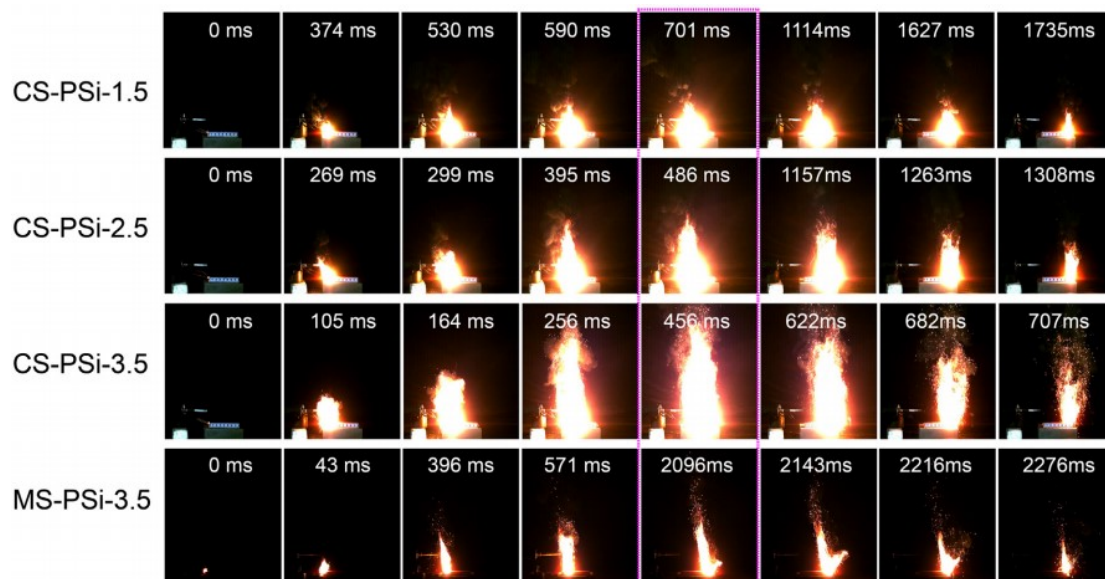

**Figure S32.** High-speed photographic sequences of the combustion processes of CS-PSi-1.5, CS-PSi-2.5, CS-PSi-3.5, and MS-PSi-3.5 composites <sup>[130]</sup>, Copyright 2023 Elsevier.

### Oxidisers

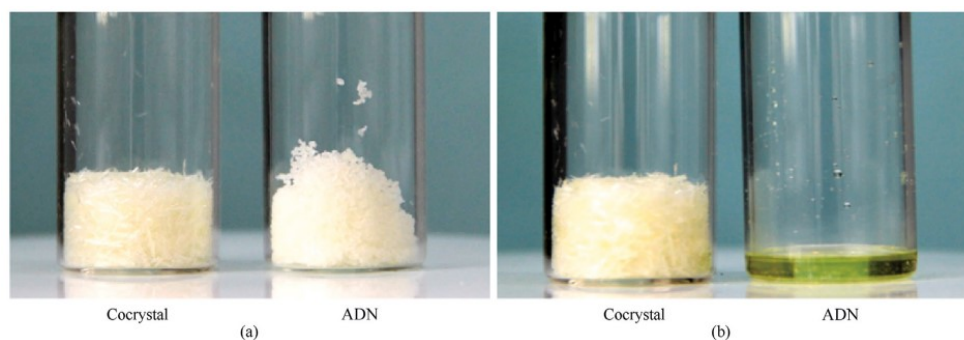

**Figure S33.** Status of ADN/18C6 cocrystal and pure ADN (a) before and (b) after hygroscopic test.

### Binders

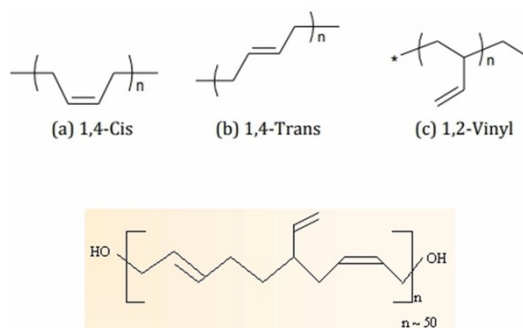

**Figure S34.** Microstructure of hydroxyl-terminated polybutadiene <sup>[131]</sup>, Copyright 2022 Wiley.

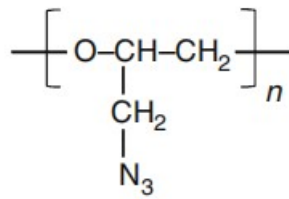

Figure S35. Structure of the monomer of GAP<sup>[132]</sup>, Copyright 2019 MDPI.

### Curing Agent

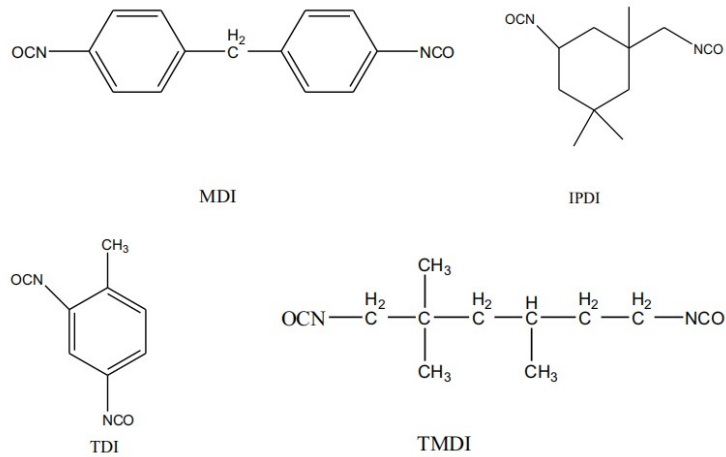

Figure S36. The chemical structure of various diisocyanates compounds <sup>[133]</sup>, Copyright 2024 Taylor & Francis.

### Macroscopic Structuring of Energetic Materials

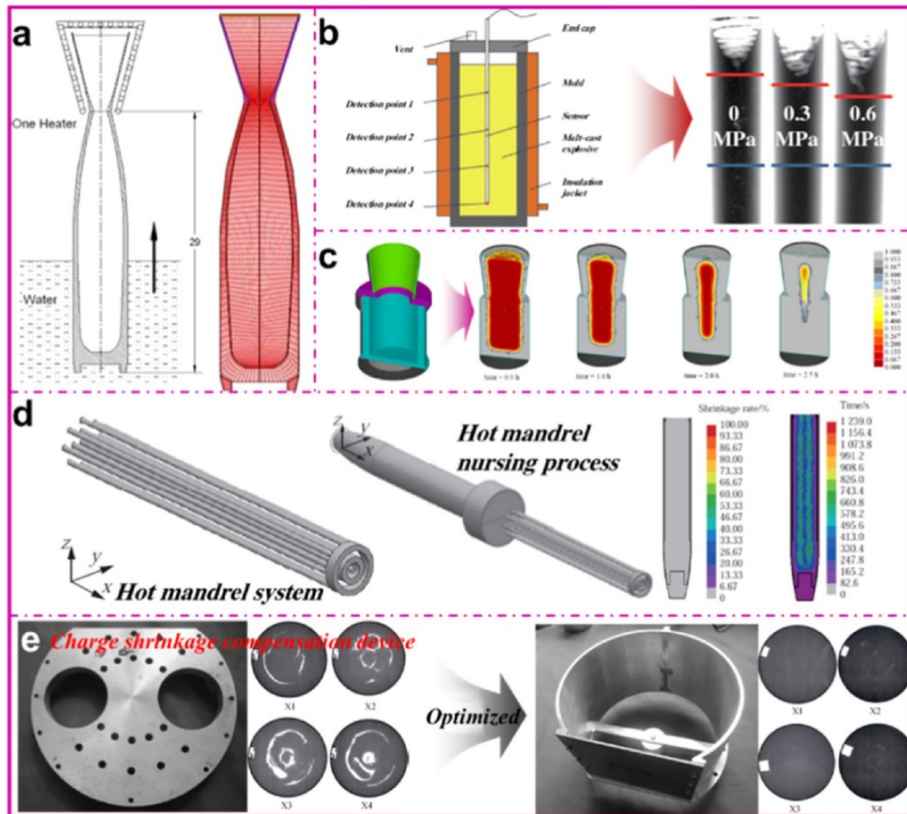

**Figure S37.** High-density melt-cast charge technology: (a) solidification in a water bath, (b) pressurized treatment, (c) riser insulation, (d) hot mandrel treatment, and (e) optimization of feeding setup [134], Copyright 2023 ACS.

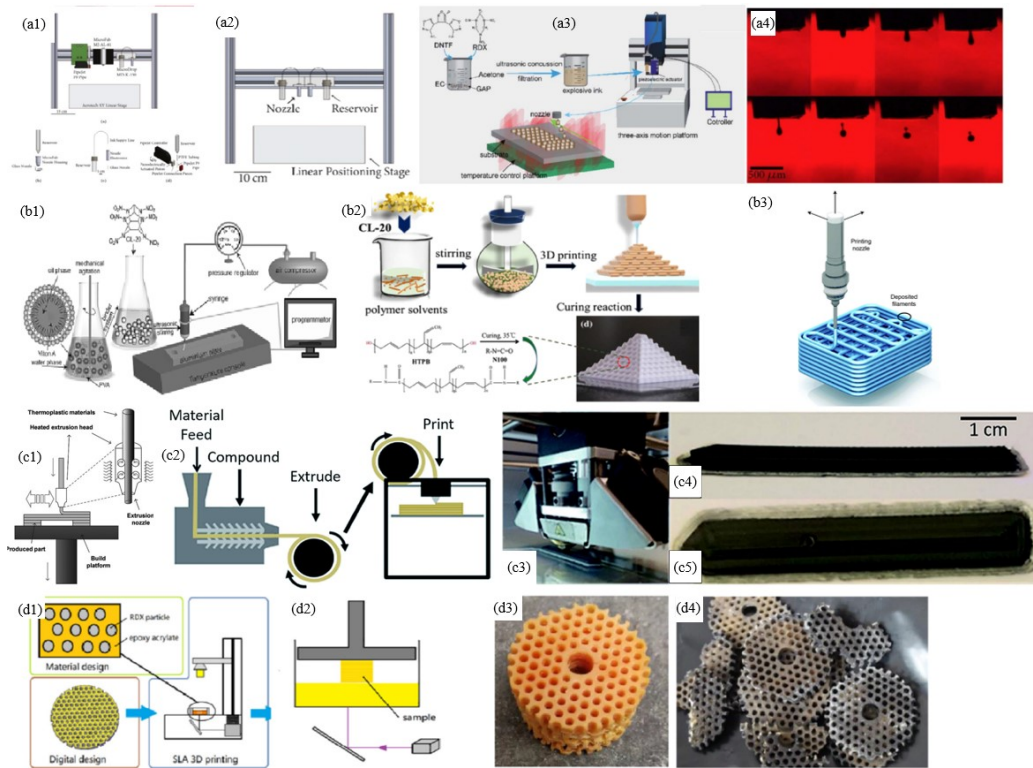

**Figure S38.** (a1) Three printing systems of Inkjet printing . (a2) Printing system with two piezoelectric inkjet nozzles. (a3) Printing system with three-axis platform and piezoelectric nozzle. (a4) Nano-aluminum droplets. (b1) Schematic illustration of the preparation of printed inks consisting of an emulsion binder and CL-20 explosives. (b2) Schematic illustration of 3D printing (DIW) of the CL-20 based explosives. (b3) Schematic illustration of DIW. (c1) the detail view of the extrusion assembly equipment and the printing stage. (c2) SLA schematic illustration of the manufacturing process. (c3) The completed sample side view. (c4) The completed print sample side view. (d1, d2) Diagram of the SLA process (d3) Photos of 3D-printed MPD propellant stack and (d4) remaining propellants after 30 mm gun test<sup>[135, 136]</sup>, Copyright 2022 KeAi and Chinese Society of Metals.

## Uncategorized References

- [1] C. Li, H. Li, K. Xu, High-substitute nitrochitosan used as energetic materials: Preparation and detonation properties, *Carbohydr. Polym.* 237 (2020) 116176.
- [2] J. Dong, Q. Yan, P. Liu, et al., The correlations among detonation velocity, heat of combustion, thermal stability and decomposition kinetics of nitric esters, *J. Therm. Anal. Calorim.* 131 (2017) 1391-1403.
- [3] W. E. Bachmann, J. C. Sheehan, A new method of preparing the high explosive RDX, *J. Am. Chem. Soc.* 71 (1949) 1842-1845.
- [4] K. F. Grebenkin, Comparative Analysis of Physical Mechanisms of Detonation Initiation in HMX and in a Low-Sensitive Explosive (TATB), *Combust. Explos. Shock Waves* 45 (2009) 78-87.
- [5] T.A. Nielsen, A.P. Chafin, S.L. Christian, et al., Synthesis of polyazapolycyclic caged polynitramines, *Tetrahedron* 54 (1998) 11793-11812.
- [6] N. Şen, J. F. Pons, G. Kurtay, et al., New explosive materials through covalent and non-covalent synthesis: Investigation of explosive properties of trinitrotoluene: Acridine and picric acid: Acridine, *J. Mol. Struct.* 1292 (2023) 136080.
- [7] C. Li, M. Liu, T. Li, et al., Fluorine Added to Lead the Way to Future Energetic Materials: 3,5-difluoro-2,4,6-trinitroaniline, *J. Energ. Mater.* 42 (2022) 706-715.
- [8] X. Liao, X. Ju, F. Zhao, et al., Substituent Effects on Thermodynamic and Detonation Properties of Polynitrobenzenes, *Propellants Explos. Pyrotech.* 35 (2010) 567-571.
- [9] H. Gao, Q. Zhang, J. Shreeve, Fused heterocycle-based energetic materials (2012–2019), *J. Mater. Chem. A* 8 (2020) 4193-4216.
- [10] D. Guo, S. Zybin, W. Goddard, et al., Enhancing the Detonation Properties of Liquid Nitromethane by Adding Nitro-Rich Molecule Nitryl Cyanide, *J. Phys. Chem. A* 124 (2020) 9787-9794.
- [11] Z. Yin, W. Huang, Y. Dong, et al., From Tetranitromethane to Gem-Dinitro-Bridged Nitrogen-Rich Heterocyclic Compound: Achieving High Heat of Detonation, *J. Org. Chem.* 88 (2023) 14004-14011.
- [12] H. Gao, J. M. Shreeve, Recent progress in taming FOX-7 (1,1-diamino-2,2-dinitroethene), *Rsc Adv.* 6 (2016) 56271-56277.
- [13] I. V. Fedyanin, K. A. Lyssenko, New hydrogen-bond-aided supramolecular synthon: a case study of 2,4,6-trinitroaniline, *CrystEngComm* 15 (2013) 10086–10093.
- [14] A. V. Kimmel, P. V. Sushko, A. L. Shluger, et al., Effect of molecular and lattice structure on hydrogen transfer in molecular crystals of diamino-dinitroethylene and triamino-trinitrobenzene, *J. Phys. Chem. A* 112 (2008) 4496–4500.
- [15] Z. Zhang, Y. Si, T. Yu, et al., Extra contribution to the crystal stability of insensitive explosive TATB: The cooperativity of intermolecular interactions, *Def. Technol.* 25 (2023) 88-98.
- [16] W. Zhu, H. Xiao, Ab Initio Study of Energetic Solids: Cupric Azide, Mercuric Azide, and Lead Azide, *J. Phys. Chem. B* 110 (2006) 18196-18203.
- [17] P. Sivaguru, Y. Ning, X. Bi, New Strategies for the Synthesis of Aliphatic Azides, *Chem. Rev.* 121 (2021) 4253-4307.
- [18] Q. Sun, P. Wang, Q. Lin, et al., All-nitrogen ion-based compounds as energetic oxidizers: a theoretical study on  $[N_5^+][NO_3^-]$ ,  $[N_5^+][N(NO_2)_2^-]$ ,  $[NO_2^+][N_5^-]$  and  $NO_2-N_3$ , *New J. Chem.* 44 (2020) 11188-11195.
- [19] Y. Xu, P. Wang, Q. Lin, et al., Density functional theory studies on two novel poly-nitrogen compounds:  $N_5^+N_3^-$  and  $N_5^+N_5^-$ , *J. Phys. Org. Chem* 34 (2020) e4135.
- [20] K. O. Christe, W. W. Wilson, J. A. Sheehy, et al.,  $N_5^+$ : A Novel Homoleptic Polynitrogen Ion as a High Energy Density Material, *Angew. Chem. Int. Ed.* 38 (1999) 2004-2009.
- [21] A. Vij, W. W. Wilson, V. Vij V, et al., Polynitrogen Chemistry. Synthesis, Characterization, and Crystal Structure of Surprisingly Stable Fluoroantimonate Salts

of N<sub>5</sub><sup>+</sup>, *J. Am. Chem. Soc.* 123 (2001) 6308-6313.

[22] C. Yang, C. Zhang, Z. Zheng, et al., Synthesis and Characterization of cyclo-Pentazolate Salts of NH<sub>4</sub><sup>(+)</sup>, NH<sub>3</sub>OH<sup>(+)</sup>, N<sub>2</sub>H<sub>5</sub><sup>(+)</sup>, C(NH<sub>2</sub>)<sub>3</sub><sup>(+)</sup>, and N(CH<sub>3</sub>)<sub>4</sub><sup>(+)</sup>, *J. Am. Chem. Soc.* 140 (2018) 16488-16494.

[23] Y. Xu, L. Tian, D. Li, et al., A series of energetic cyclo-pentazolate salts: rapid synthesis, characterization, and promising performance, *J. Mater. Chem. A* 7 (2019) 12468-12479.

[24] X. Wang, Z. Dong, R. Yang, et al., Syntheses and Characterization of two cyclo-pentazolate salts, *Z. Anorg. Allg. Chem.* 647 (2021) 681-685.

[25] Y. Xu, Q. Wang, C. Shen, et al., A series of energetic metal pentazolate hydrates, *Nature* 549 (2017) 78-81.

[26] C. Yang, L. Chen, W. Wu, et al., Investigating the stabilizing forces of pentazolate salts., *ACS Appl. Energy Mater.* 4 (2020) 146-153.

[27] Y. Xu, P. Wang, Q. Lin, et al., A carbon-free inorganic-metal complex consisting of an all-nitrogen pentazole anion, a Zn(ii) cation and H<sub>2</sub>O, *Dalton. Trans.* 46 (2017) 14088-14093.

[28] W. Hu, H. Yang, J. Chen, et al., Nonmetallic Pentazole Salts Based on Furazan or 4-Nitropyrazole for Enhancing Density and Stability, *Cryst. Growth Des.* 21 (2021) 2690-2698.

[29] F. Jiao, C. Zhang, Origin of the considerably high thermal stability of cyclo-N<sub>5</sub><sup>-</sup> containing salts at ambient conditions, *CrystEngComm* 21 (2019) 3592-3604.

[30] T. M. Klapötke, M. Stein, J. Stierstorfer, Salts of 1H-Tetrazole – Synthesis, Characterization and Properties, *Z. Anorg. Allg. Chem.* 634 (2008) 1711-1723.

[31] P. Ma, X. Xu, R. Zhang, et al., Synthesis, thermal hazard analysis and density functional theory study of nitroimidazoles, *Thermochim. Acta* 707 (2022) 179097.

[32] J. R. Cho, K. J. Kim, S. G. Cho, et al., Synthesis and characterization of 1-methyl-2,4,5-trinitroimidazole (MTNI), *J. Heterocycl. Chem.* 39 (2009) 141-147.

[33] T. M. Klapötke, C. M. Sabaté, J. Stierstorfer, Neutral 5-nitrotetrazoles: easy initiation with low pollution, *New J. Chem.* 33 (2009) 136-147.

[34] Y. Kang, Y. Dong, Y. Liu, et al., Halogen bonding (C-F···X) and its effect on creating ideal insensitive energetic materials, *Chem. Eng. J.* 440 (2022) 135969.

[35] M. Thomas, Klapötke, Sabaté Carles Miró, Nitrogen-Rich Tetrazolium Azotetrazolate Salts: A New Family of Insensitive Energetic Materials, *Chem. Mater.* 20 (2008) 1750-1763.

[36] P. Yin, J. Zhang, D. A. Parrish, et al., Energetic fused triazoles – a promising C–N fused heterocyclic cation, *J. Mater. Chem. A* 3 (2015) 8606-8612.

[37] J. Zhang, D. A. Parrish, J. M. Shreeve, Thermally stable 3,6-dinitropyrazolo[4,3-c]pyrazole-based energetic materials, *Chem. Asian. J.* 9 (2014) 2953-60.

[38] Y. Tang, C. He, G. H. Imler, et al., Dinitromethyl-3(5)-1,2,4-oxadiazole Derivatives from Controllable Cyclization Strategies, *Chem. Eur. J.* 23 (2017) 16401-16407.

[39] D. E. Chavez, M. C. Schulze, D. A. Parrish, Synthesis and Characterization of N<sub>3</sub>-(2,2,2-Trinitroethyl)-1,2,4-Oxadiazole-3,5-Diamine, *Chem. Heterocycl. Comp.* 53 (2017) 737-739.

[40] Y. Tang, J. Zhang, L. A. Mitchell, et al., Taming of 3,4-Di(nitramino)furazan, *J. Am. Chem. Soc.* 137 (2015) 15984-15987.

[41] J. Ma, A. K. Chinnam, G. Cheng, et al., 1,3,4-Oxadiazole Bridges: A Strategy to Improve Energetics at the Molecular Level, *Angew. Chem. Int. Ed.* 60 (2021) 5497-5504.

[42] W. Cao, W. Dong, Z. Lu, et al., Construction of Coplanar Bicyclic Backbones for 1,2,4-Triazole-1,2,4-Oxadiazole-Derived Energetic Materials, *Chemistry* 27 (2021) 13807-13818.

[43] Q. Xue, F. Bi, J. Zhang, et al., A Family of Energetic Materials Based on 1,2,4-Oxadiazole and 1,2,5-Oxadiazole Backbones With Low Insensitivity and Good Detonation Performance, *Front. Chem.* 7 (2019) 942-951.

- [44] T. Zhu, C. Li, J. Tang, et al., [5,6,5]-Tricyclic Energetic Compounds with Piperazine, Triazole, and 1,2,5-Oxadiazole Rings in Framework, *Cryst. Growth Des.* 24 (2024) 8847-8854.
- [45] C. Ma, Y. Pan, J. Jiang, et al., Synthesis and thermal behavior of a fused, tricyclic pyridine-based energetic material: 4-amino-5-nitro-[1,2,5]oxadiazolo[3,4-e]tetra-zolo[1,5-a]pyridine-3-oxide, *New J. Chem.* 42 (2018) 11259-11263.
- [46] Q. Wang, C. Lei, H. Yang, et al., One-step synthesis of polynitropyridine-based thermostable and low sensitive energetic materials, *Energetic Mater. Front.* 3 (2022) 68-73.
- [47] C. Li, T. Zhu, C. Wang, et al., Advanced ultra heat-resistant explosives with multiple heterocyclic skeletons of hydrogen bond network, *J. Mater. Chem. A* 12 (2024) 24188-24194.
- [48] H. Liu, H. Du, G. Wang, et al., Theoretical studies on the structures, densities, detonation properties and pyrolysis mechanism of energetic compounds containing pyridine ring, *Struct. Chem.* 23 (2011) 479-486.
- [49] A. Maan, V. D. Ghule., S. Dharavath, Computational Evaluation of Polycyclic Bis-Oxadiazolo-Pyrazine Backbone in Designing Potential Energetic Materials, *Polycycl. Aromat. Comp.* 43 (2022) 6717-6729.
- [50] J. Feng, J. Sun, L. Yang, et al., 3,7-Dinitroimidazo[1,2-b]pyridazine-6,8-diamine: A promising building block for advanced heat-resistant and low-sensitivity energetic materials, *Energetic Mater. Front.* 5 (2024) 1-7.
- [51] X. Song, J. Li, H. Hou, et al., Extensive theoretical studies of a new energetic material: tetrazino-tetrazine-tetraoxide (TTTO), *J. Comput. Chem.* 30 (2009) 1816-1820.
- [52] Y. Cao, Z. Cai, J. Shi, et al., A heat-resistant and insensitive energetic material based on the pyrazolo-triazine framework, *Energetic Mater. Front.* 3 (2022) 26-31.
- [53] L. Hu, C. He, G. Zhao, et al., Selecting Suitable Substituents for Energetic Materials Based on a Fused Triazolo-[1,2,4,5]tetrazine Ring, *ACS Appl. Energy Mater.* 3 (2020) 5510-5516.
- [54] I. Sedgi, S. Kozuch, Quantum tunneling instability of the mythical hexazine and pentazine, *Chem. Commun.* 60 (2024) 2038-2041.
- [55] J. Zhang, H. Xiao, Computational studies on the infrared vibrational spectra, thermodynamic properties, detonation properties, and pyrolysis mechanism of octanitrocubane, *J. Chem. Phys.* 116 (2002) 10674-10683.
- [56] Y. Bayat, G. Taheripouya, V. Zeynali, et al., Methods and strategies to achieve hexanitrohexaazaisowurtzitane (HNIW or CL-20): a comprehensive overview, *J. Energ. Mater.* 43 (2023) 62-96.
- [57] X. Zeng, N. Li, Q. Jiao, Carbon-free energetic materials: computational study on nitro-substituted BN-cage molecules with high heat of detonation and stability, *RSC Adv.* 8 (2018) 14654-14662.
- [58] Y. Ling, P. Zhang, L. Sun, et al., Efficient Synthesis of 2,2,4,4,6,6-Hexanitroadamantane under Mild Conditions, *Synthesis* 46 (2014) 2225-2233.
- [59] T. M. Klapötke, B. Krumm, A. Widera, Synthesis and Properties of Tetranitro-Substituted Adamantane Derivatives, *ChemPlusChem* 83 (2018) 61-69.
- [60] L. Zhu, Q. Zhou, W. Wang, et al., Synthesis and characterization of a new cage-like energetic compound 3,7-dinitrato-9-nitro-9-azanoradamantane, *Energetic Mater. Front.* (2024).
- [61] J. Zhang, T. Hou, L. Zhang, et al., 2,4,4,6,8,8-Hexanitro-2,6-diazaadamantane: A High-Energy Density Compound with High Stability, *Org. Lett.* 20 (2018) 7172-7176.
- [62] D. Chen, H. Xiong, H. Yang, et al., Nitropyrazole based tricyclic nitrogen-rich cation salts: A new class of promising insensitive energetic materials, *FirePhysChem* 1 (2021) 71-75.
- [63] P. Bhatia, P. Das, D. Kumar, Engaging Two Anions with Single Cation in Energetic Salts: Approach for Optimization of Oxygen Balance in Energetic Materials, *ACS Appl. Mater. Interfaces* 16 (2024) 64846-64857.
- [64] B.C. Tappan, C.D. Incarvito, A.L. Rheingold, et al., Thermal

decomposition of energetic materials 79: thermal, vibrational, and X-ray structural characterization of metal salts of mono- and di-anionic 5-nitraminotetrazole, *Thermochim. Acta* 384 (2002) 113-120.

[65] P. Yin, L. A. Mitchell, D. A. Parrish, et al., Comparative Study of Various Pyrazole-based Anions: A Promising Family of Ionic Derivatives as Insensitive Energetic Materials, *Chem. Asian J.* 12 (2017) 378-384.

[66] Z. Zhang, J. Zhang, 1-Amine-1,2,3-triazolium salts with oxidizing anions: A new family of energetic materials with good performance, *J. Mol. Struct.* 1158 (2018) 88-95.

[67] P. Yin, J. M. Shreeve, From N-Nitro to N-Nitroamino: Preparation of High-Performance Energetic Materials by Introducing Nitrogen-Containing Ions, *Angew. Chem. Int. Ed.* 54 (2015) 14513-14517.

[68] P. Bhatia, P. Das, A. Bijlwan, et al., Systematic Synthesis of Thermally Stable Zwitterionic Energetic Materials Based on 4-Hydroxy-3,5-dinitropyrazole, *Org. Lett.* 26 (2024) 9781-9786.

[69] X. Miao, J. Yu, Y. Li, et al., Constructing Nitrogen-Rich Fused [5,6,5]-Tricyclic Frameworks Through Rearrangement: Heat-Resistant Zwitterionic Salt Energetic Materials, *Org. Lett.* 26 (2024) 10085-10089.

[70] P. Kumar, N. Kumar, V. D. Ghule, et al., Zwitterionic fused pyrazolo-triazole based high performing energetic materials, *Chem. Commun.* 60 (2024) 1646-1649.

[71] R. Lv, L. Jiang, J. Wang, et al., A zwitterionic fused-ring framework as a new platform for heat-resistant energetic materials, *J. Mater. Chem. A* 12 (2024) 10050-10058.

[72] T. Liu, S. Liao, S. Song, et al., Combination of gem-dinitromethyl functionality and a 5-amino-1,3,4-oxadiazole framework for zwitterionic energetic materials, *Chem. Commun.* 56 (2020) 209-212.

[73] Z. Wang, Q. Lai, N. Ding, et al., Construction of zwitterionic 3D hydrogen-bonded networks: Exploring the upper-limit of thermal stability in ternary CHN-based energetic materials, *Chem. Eng. J.* 474 (2023) 145512.

[74] A. R. Katritzky, S. Singh, K. Kirichenko, et al., 1-butyl-3-methylimidazolium 3,5-dinitro-1,2,4-triazolate: a novel ionic liquid containing a rigid, planar energetic anion, *Chem. Commun. (Camb)* 7 (2005) 868-70.

[75] C. Ye, J. C. Xiao, B. Twamley, et al., Energetic salts of azotetrazolate, iminobis(5-tetrazolate) and 5, 5'-bis(tetrazolate), *Chem. Commun. (Camb)* 21 (2005) 2750-2752.

[76] S. Schneider, T. Hawkins, M. Rosander, et al., Liquid azide salts and their reactions with common oxidizers IRFNA and N<sub>2</sub>O<sub>4</sub>, *Inorg. Chem.* 47 (2008).

[77] A. R. Katritzky, H. Yang, D. Zhang, et al., Strategies toward the design of energetic ionic liquids: nitro- and nitrile-substituted N,N'-dialkylimidazolium salts, *New J. Chem.* 30 (2006) 349-358.

[78] M. Smiglak, C. C. Hines, T. B. Wilson, et al., Ionic liquids based on azolate anions, *Chemistry* 16 (2010) 1572-1584.

[79] R. Wang, H. Gao, C. Ye, et al., Strategies toward syntheses of triazolyl- or triazolium-functionalized unsymmetrical energetic salts., *Chem. Mater.* 19 (2007).

[80] L. He, G. H. Tao, D. A. Parrish, et al., Liquid dinitromethanide salts, *Inorg. Chem.* 50 (2011) 679-685.

[81] H. Xue, S. W. Arritt, B. Twamley, et al., Energetic salts from N-aminoazoles., *Inorg. Chem.* 43 (2004) 7972-7977.

[82] H. Xue, Y. Gao, B. Twamley, et al., New Energetic Salts Based on Nitrogen-Containing Heterocycles, *Chem. Mater.* 17 (2005) 191-198.

[83] H. Xue, Y. Gao, B. Twamley, et al., Energetic azolium azolate salts, *Inorg. Chem.* 44 (2005) 5068-5072.

[84] H. Xue, B. Twamley, J. M. Shreeve, Energetic salts of substituted 1,2,4-triazolium and tetrazolium 3,5-dinitro-1,2,4-triazolates, *J. Mater. Chem.* 15 (2005) 3459-3465.

[85] T. M. Klapötke, P. Mayer, A. Schulz, et al., 1, 5-Diamino-4-methyltetrazolium Dinitramide., *J. Am. Chem. Soc.* 127 (2005) 2032-2033.

- [86] T. M. Klapotke, J. Stierstorfer, Azidoformamidinium and 5-aminotetrazolium dinitramide-two highly energetic isomers with a balanced oxygen content, *Dalton. Trans.* (2009) 643-653.
- [87] Z. Zeng, B. Twamley, J. N. M. Shreeve, Structure and properties of substituted imidazolium, triazolium, and tetrazolium poly (1, 2, 4-triazolyl) borate salts, *Organometallics* 26 (2007) 1782-1787.
- [88] T. Schneider, T. Hawkins, M. Rosander, et al., Ionic liquids as hypergolic fuels, *Energy Fuels* 22 (2008) 2871-2872.
- [89] L. He, G. Tao, D. A. Parrish, et al., Nitrocyamide-based ionic liquids and their potential applications as hypergolic fuels, *Chemistry* 16 (2010) 5736-5743.
- [90] Y. Joo, H. Gao, Y. Zhang, et al., Inorganic or organic azide-containing hypergolic ionic liquids, *Inorg. Chem.* 49 (2010) 3282-3288.
- [91] Y. Zhang, J. M. Shreeve, Dicyanoborate-based ionic liquids as hypergolic fluids, *Angew. Chem. Int. Ed.* 50 (2011) 935-937.
- [92] S. Li, H. Gao, J. M. Shreeve, Borohydride ionic liquids and borane/ionic-liquid solutions as hypergolic fuels with superior low ignition-delay times, *Angew. Chem. Int. Ed.* 53 (2014) 2969-2972.
- [93] Q. Zhang, P. Yin, J. Zhang, et al., Cyanoborohydride-based ionic liquids as green aerospace bipropellant fuels, *Chemistry* 20 (2014) 6909-6914.
- [94] S. Chen, Z. Yang, B. Wang, et al., Molecular perovskite high-energetic materials, *Sci. China Mater.* 61 (2018) 1123-1128.
- [95] Y. Shang, R. Huang, S. Chen, et al., Metal-Free Molecular Perovskite High-Energetic Materials, *Cryst. Growth Des.* 20 (2020) 1891-1897.
- [96] S. Chen, Y. Shang, J. Jiang, et al., A new nitrate-based energetic molecular perovskite as a modern edition of black powder, *Energetic Mater. Front.* 3 (2022) 122-127.
- [97] S. Chen, Y. Shang, C. He, et al., Optimizing the oxygen balance by changing the A-site cations in molecular perovskite high-energetic materials, *CrystEngComm* 20 (2018) 7458-7463.
- [98] Y. Shang, S. L. Chen, Z. H. Yu, et al., Silver(I)-Based Molecular Perovskite Energetic Compounds with Exceptional Thermal Stability and Energetic Performance, *Inorg. Chem.* 61 (2022) 4143-4149.
- [99] Z. Yu, D. Liu, Y. Ling, et al., Periodate-based molecular perovskites as promising energetic biocidal agents, *Sci. China Mater.* 66 (2022) 1641-1648.
- [100] T. Wang, Z. Lu, Z. Yi, et al., Study on Primary Explosive: Cu(ClO<sub>4</sub>)<sub>2</sub>-Based Energetic Coordination Compounds as a Template, *Cryst. Growth Des.* 23 (2023) 5528-5534.
- [101] S. Li, T. Wang, C. Zhang, et al., Balancing the Energy and Sensitivity of Primary Explosives: Using Isomers to Prepare Energetic Coordination Compounds, *Inorg. Chem.* 64 (2025) 2020-2029.
- [102] C. Zhang, T. Wang, M. Xu, et al., Regulating the Coordination Environment by Using Isomeric Ligands: Enhancing the Energy and Sensitivity of Energetic Coordination Compounds, *Inorg. Chem.* 62 (2023) 17417-17424.
- [103] Z. Lu, T. Wang, M. Sun, et al., Synthesis of energetic coordination compounds based on pyrazole and 4-chloropyrazole via co-melting crystallization method, *CrystEngComm* 26 (2024) 1178-1188.
- [104] M. Friedrich, J. C. Gálvez-Ruiz, T. M. Klapötke, et al., BTA copper complexes, *Inorg. Chem.* 44 (2005) 8044-8052.
- [105] G. H. Tao, D. A. Parrish, J. M. Shreeve, Nitrogen-rich 5-(1-methylhydrazinyl)tetrazole and its copper and silver complexes, *Inorg. Chem.* 51 (2012) 5305-5312.
- [106] S. Cudzilo, M. Nita, Synthesis and explosive properties of copper(II) chlorate(VII) coordination polymer with 4-amino-1,2,4-triazole bridging ligand, *J. Hazard. Mater.* 177 (2010) 146-149.
- [107] B. Wu, T. Zhang, Y. Li, et al., Energetic Compounds Based on 4-Amino-1, 2, 4-triazole (ATZ) and Picrate (PA): [Zn(H<sub>2</sub>O)<sub>6</sub>](PA)<sub>2</sub>·3H<sub>2</sub>O and [Zn(ATZ)<sub>3</sub>](PA)<sub>2</sub>·2.5H<sub>2</sub>O]<sub>n</sub>, *Z. Anorg. Allg. Chem.* 639 (2013) 2209-2215.
- [108] O. S. Bushuyev, P. Brown, A. Maiti, et al., Ionic polymers as a new

structural motif for high-energy-density materials, *J. Am. Chem. Soc.* 134 (2012) 1422-1425.

[109] B. Wu, Y. Bi, F. Li, et al., A Novel Stable High-Nitrogen Energetic Compound: Copper(II) 1,2-Diaminopropane Azide, *Z. Anorg. Allg. Chem.* 640 (2013) 224-228.

[110] B. Wu, Z. Zhou, F. Li, et al., Preparation, crystal structures, thermal decompositions and explosive properties of two new high-nitrogen azide ethylenediamine energetic compounds, *New J. Chem.* 37 (2013) 646-653.

[111] C. Xu, J. Zhang, X. Yin, et al., Cd(II) complexes with different nuclearity and dimensionality based on 3-hydrazino-4-amino-1,2,4-triazole, *J. Solid State Chem.* 226 (2015) 59-65.

[112] X. Liu, W. Gao, P. Sun, et al., Environmentally friendly high-energy MOFs: crystal structures, thermostability, insensitivity and remarkable detonation performances, *Green Chem.* 17 (2015) 831-836.

[113] Z. Liu, T. Zhang, J. Zhang, et al., Studies on three-dimensional coordination polymer  $[Cd_2(N_2H_4)_2(N_3)_4]_n$ : crystal structure, thermal decomposition mechanism and explosive properties, *J. Hazard. Mater.* 154 (2008) 832-838.

[114] S. Wang, F. Zheng, M. Wu, et al., Hydrothermal syntheses, crystal structures and physical properties of a new family of energetic coordination polymers with nitrogen-rich ligand N-[2-(1H-tetrazol-5-yl)ethyl]glycine, *CrystEngComm* 15 (2013).

[115] S. Li, Y. Wang, C. Qi, et al., 3D energetic metal-organic frameworks: synthesis and properties of high energy materials, *Angew. Chem. Int. Ed.* 52 (2013) 14031-14035.

[116] S. Zhang, X. Liu, Q. Yang, et al., A new strategy for storage and transportation of sensitive high-energy materials: guest-dependent energy and sensitivity of 3D metal-organic-framework-based energetic compounds, *Chemistry* 20 (2014) 7906-7910.

[117] J. Song, T. Guo, M. Yao, et al., A comparative study of thermal kinetics and combustion performance of Al/CuO, Al/Fe<sub>2</sub>O<sub>3</sub> and Al/MnO<sub>2</sub> nanothermites, *Vacuum* 176 (2020) 109339.

[118] T. Zhang, Z. Wang, G. Li, et al., Tuning the reactivity of Al/Fe<sub>2</sub>O<sub>3</sub> nanoenergetic materials via an approach combining soft template self-assembly with sol-gel process process, *J. Solid State Chem.* 230 (2015) 1-7.

[119] X. Ke, X. Zhou, H. Gao, et al., Surface functionalized core/shell structured CuO/Al nanothermite with long-term storage stability and steady combustion performance, *Mater. Des.* 140 (2018) 179-187.

[120] M. Zaky, A. Elbeih, T. Elshenawy, Review of Nano-thermites; a Pathway to Enhanced Energetic Materials, *Cent. Eur. J. Energ. Mater.* 18 (2021) 63-85.

[121] M. Wang, W. Xiong, D. Chang, et al., Effect of Microstructure on Energy Release Characteristics of Al/Ni Energetic Structural Material Prepared by Cold Spraying, *Langmuir* 40 (2024) 18619-18630.

[122] A. Prakash, A. V. McCormick, M. R. Zachariah, Synthesis and Reactivity of a Super-Reactive Metastable Intermolecular Composite Formulation of Al/KMnO<sub>4</sub>, *Adv. Mater.* 17 (2005) 900-903.

[123] M. G. Zaky, M. S. Elwesemy, M. Abdelhafiz, et al., The impact of various metals on the performance of TNT, *J. Phys. Conf. Ser.* 2830 (2024) 012028.

[124] Y. He, X. Wang, Y. Ren, et al., Initial response and combustion behavior of microscale Al/PTFE energetic material by nanosecond laser ignition, *Combust. Flame* 254 (2023) 112838.

[125] C. Wu, J. Nie, S. Li, et al.,  $\mu$ Al-based reactive materials with improved energy efficiency by using the fluorine-containing oxidizer perfluoropolyether as an interfacial layer, *Combust. Flame* 248 (2023) 112554.

[126] Z. Wu, J. Liu, S. Zhang, et al., Enhanced thermal- and impact-initiated reactions of PTFE/Al energetic materials through ultrasonic-assisted core-shell construction, *Def. Technol.* 18 (2022) 1362-1368.

[127] K. Gao, G. Li, Y. Luo, et al., Preparation and characterization of the AP/Al/Fe<sub>2</sub>O<sub>3</sub> ternary nano-thermites, *J. Therm. Anal. Calorim.* 118 (2014) 43-49.

- [128] H. Gao, W. Pan, X. Feng, Effect of AP distribution on energy release characteristics and functional force of HMX/AP/Al explosives, *Propellants Explos. Pyrotech.* 49 (2024) e202300263.
- [129] Y. Chen, H. Ren, X. Wu, et al., “Litchi-like” metastable Al/Ti/CuO micro-nano composites with enhanced combustion reaction and their energy characteristics, *Combust. Flame* 256 (2023) 112947.
- [130] Z. Zhuang, K. Xu, B. Liu, et al., Improved reactivity and energy release performance of core-shell structured fuel-rich Si/PTFE energetic composites, *Combust. Flame* 255 (2023) 112889.
- [131] J. C. Quagliano Amado, P. G. Ross, L. Mattos Silva Murakami, et al., Properties of Hydroxyl-Terminal Polybutadiene (HTPB) and Its Use as a Liner and Binder for Composite Propellants: A Review of Recent Advances, *Propellants Explos. Pyrotech.* 47 (2022) e202100283.
- [132] T. Jarosz, A. Stolarczyk, A. Wawrzkiwicz-Jalowiecka, et al., Glycidyl Azide Polymer and its Derivatives-Versatile Binders for Explosives and Pyrotechnics: Tutorial Review of Recent Progress, *Molecules* 24 (2019) 4475-4520.
- [133] P. Kishore, A. Singh, R. Kumar, et al., Effect of curative in hydroxyl-terminated polybutadiene-based binder system on characteristic properties and kinetics of polymer-based energetic composite, *J. Energ. Mater.* (2024) 1-28.
- [134] S. Wang, Y. Zhang, C. Wu, et al., Equal-Material Manufacturing of a Thermoplastic Melt-Cast Explosive Using Thermal-Pressure Coupling Solidification Treatment Technology, *ACS Omega* 8 (2023) 16251-16262.
- [135] J. Zhang, K. He, D. Zhang, et al., Three-dimensional printing of energetic materials: A review, *Energetic Mater. Front.* 3 (2022) 97-108.
- [136] N. Chen, C. He, S. Pang, Additive manufacturing of energetic materials: Tailoring energetic performance via printing, *J. Mater. Sci. Technol.* 127 (2022) 29-47.
